# Supplementary material for: Factors influencing the distribution of woody plants in tropical karst hills, south China
Source: PeerJ journal article supplement (doi:10.7717/peerj.16331), 2023-10-27

# Bray-Curtis Anosim

$R = 0.588$ ,  $P = 0.001$

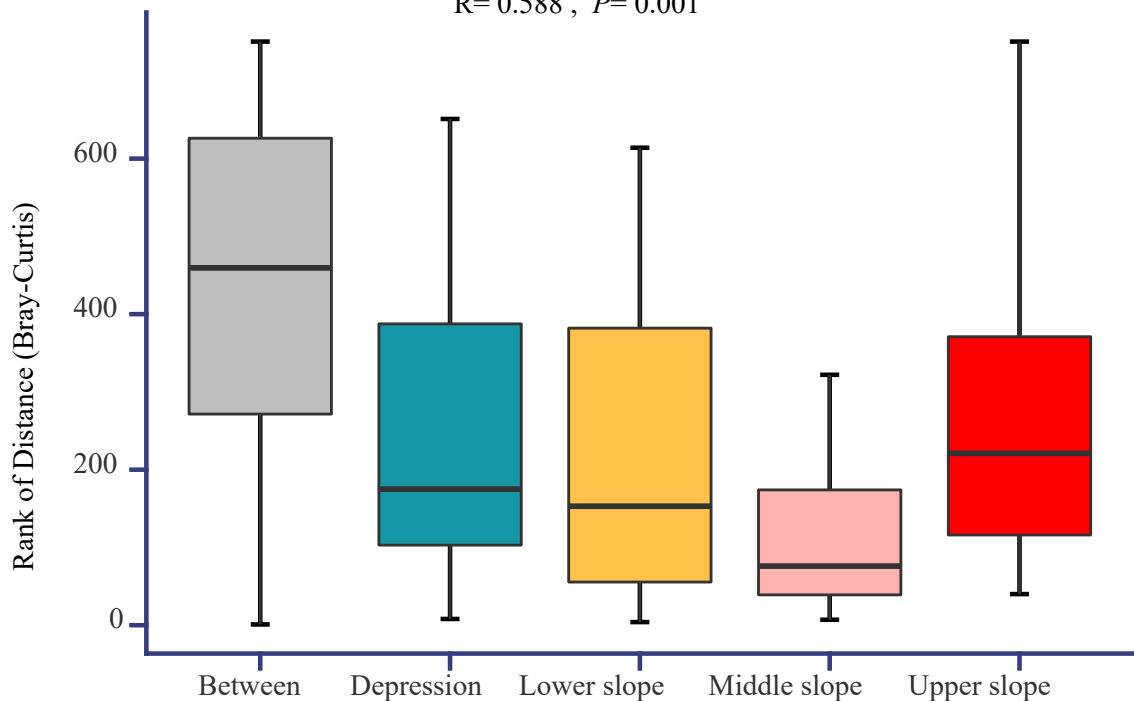

Supplement: FigureS1.pdf [file FigureS1.pdf]
