# Supplementary material for: Factors influencing the distribution of woody plants in tropical karst hills, south China
Source: PeerJ. 2023 Oct 27;11:e16331. doi: 10.7717/peerj.16331 (PMC10615033; doi:10.7717/peerj.16331)
Supplement: Supplemental Information 8 [file peerj-11-16331-s008.xlsx]

## Sheet: Species data
Plot no.	Latin name	Family	Genus	DBH (cm)	Height (m)
DE1	Litsea variabilis var. oblonga	Lauraceae	Litsea	3.1	7		Depression (DE)
DE1	Bischofia javanica	Phyllanthaceae	Bischofia	6.1	7.5		Lower slope (LS)
DE1	Metadina trichotoma	Rubiaceae	Metadina	2.4	4.5		Middle slope (MS)
DE1	Sterculia monosperma	Malvaceae	Sterculia	6.1	8		Upper slope (US)
DE1	Litsea variabilis var. oblonga	Lauraceae	Litsea	1.8	3.5
DE1	Antidesma bunius	Phyllanthaceae	Antidesma	3.2	5.5
DE1	Ardisia thyrsiflora	Primulaceae	Ardisia	3.7	5
DE1	Metadina trichotoma	Rubiaceae	Metadina	1.6	4
DE1	Metadina trichotoma	Rubiaceae	Metadina	1.7	4
DE1	Ficus hispida	Moraceae	Ficus	1.2	2.5
DE1	Metadina trichotoma	Rubiaceae	Metadina	1.3	3.5
DE1	Metadina trichotoma	Rubiaceae	Metadina	1	2.5
DE1	Sterculia monosperma	Malvaceae	Sterculia	9.7	7
DE1	Deutzianthus tonkinensis	Euphorbiaceae	Deutzianthus	18.7	14
DE1	Metadina trichotoma	Rubiaceae	Metadina	1.1	3.5
DE1	Metadina trichotoma	Rubiaceae	Metadina	4.2	5.5
DE1	Ficus hispida	Moraceae	Ficus	2.1	5
DE1	Metadina trichotoma	Rubiaceae	Metadina	1.4	3
DE1	Litsea variabilis var. oblonga	Lauraceae	Litsea	2.9	4.5
DE1	Metadina trichotoma	Rubiaceae	Metadina	2	3.5
DE1	Litsea variabilis var. oblonga	Lauraceae	Litsea	3.3	6
DE1	Metadina trichotoma	Rubiaceae	Metadina	2.1	4
DE1	Metadina trichotoma	Rubiaceae	Metadina	1.8	4
DE1	Deutzianthus tonkinensis	Euphorbiaceae	Deutzianthus	21.5	11
DE1	Metadina trichotoma	Rubiaceae	Metadina	2	4.5
DE1	Metadina trichotoma	Rubiaceae	Metadina	2.2	3.5
DE1	Metadina trichotoma	Rubiaceae	Metadina	1.2	3
DE1	Metadina trichotoma	Rubiaceae	Metadina	1.6	3.5
DE1	Litsea variabilis var. oblonga	Lauraceae	Litsea	2	3.5
DE1	Tetrapanax papyrifer	Araliaceae	Tetrapanax	2.4	3.5
DE1	Ficus cyrtophylla	Moraceae	Ficus	18.2	10.5
DE1	Litsea variabilis var. oblonga	Lauraceae	Litsea	3.9	6
DE1	Litsea variabilis var. oblonga	Lauraceae	Litsea	2.8	3
DE1	Metadina trichotoma	Rubiaceae	Metadina	1.4	2.5
DE1	Caryota obtusa	Arecaceae	Caryota	38.4	15
DE1	Metadina trichotoma	Rubiaceae	Metadina	1.5	2.5
DE1	Caryota obtusa	Arecaceae	Caryota	43.3	17
DE1	Litsea monopetala	Lauraceae	Litsea	7	9
DE1	Metadina trichotoma	Rubiaceae	Metadina	2.1	4.5
DE1	Saurauia tristyla	Actinidiaceae	Saurauia	12.3	9
DE1	Metadina trichotoma	Rubiaceae	Metadina	1.1	3
DE1	Saurauia tristyla	Actinidiaceae	Saurauia	10.3	9
DE1	Ardisia thyrsiflora	Primulaceae	Ardisia	2.7	5.5
DE1	Litsea variabilis var. oblonga	Lauraceae	Litsea	2.5	4.5
DE1	Litsea variabilis var. oblonga	Lauraceae	Litsea	1.5	3
DE1	Canarium subulatum	Burseraceae	Canarium	18.8	13
DE1	Metadina trichotoma	Rubiaceae	Metadina	1.7	3.5
DE1	Bischofia javanica	Phyllanthaceae	Bischofia	1.4	2.5
DE1	Bennettiodendron leprosipes	Salicaceae	Bennettiodendron	1.6	2.5
DE1	Metadina trichotoma	Rubiaceae	Metadina	1.4	3
DE1	Metadina trichotoma	Rubiaceae	Metadina	1.7	3.5
DE1	Metadina trichotoma	Rubiaceae	Metadina	1.3	3
DE1	Ficus cyrtophylla	Moraceae	Ficus	9.4	7
DE1	Metadina trichotoma	Rubiaceae	Metadina	1.1	2.5
DE1	Metadina trichotoma	Rubiaceae	Metadina	2.3	4
DE1	Metadina trichotoma	Rubiaceae	Metadina	1.4	3.5
DE1	Metadina trichotoma	Rubiaceae	Metadina	1.8	3.5
DE1	Ficus hispida	Moraceae	Ficus	1.5	3
DE1	Ficus hispida	Moraceae	Ficus	1.6	3.5
DE1	Metadina trichotoma	Rubiaceae	Metadina	2.2	4.5
DE1	Metadina trichotoma	Rubiaceae	Metadina	1.9	4
DE1	Metadina trichotoma	Rubiaceae	Metadina	1.1	2.5
DE1	Metadina trichotoma	Rubiaceae	Metadina	1.3	2.5
DE1	Metadina trichotoma	Rubiaceae	Metadina	1.5	2.5
DE1	Metadina trichotoma	Rubiaceae	Metadina	1.1	2.5
DE1	Glochidion ellipticum	Phyllanthaceae	Glochidion	4.1	6
DE1	Sterculia monosperma	Malvaceae	Sterculia	7.6	7.5
DE1	Metadina trichotoma	Rubiaceae	Metadina	2.3	4
DE1	Metadina trichotoma	Rubiaceae	Metadina	1.8	4
DE1	Antidesma bunius	Phyllanthaceae	Antidesma	1	2.5
DE1	Litsea variabilis var. oblonga	Lauraceae	Litsea	3.6	5.5
DE1	Litsea variabilis var. oblonga	Lauraceae	Litsea	1.3	3
DE1	Deutzianthus tonkinensis	Euphorbiaceae	Deutzianthus	9.1	9.5
DE1	Ficus hispida	Moraceae	Ficus	8.2	10
DE1	Caryota obtusa	Arecaceae	Caryota	37.8	16
DE1	Metadina trichotoma	Rubiaceae	Metadina	1	2.5
DE1	Metadina trichotoma	Rubiaceae	Metadina	1.2	3
DE1	Clerodendrum wallichii	Lamiaceae	Clerodendrum	1.1	2.5
DE1	Litsea variabilis var. oblonga	Lauraceae	Litsea	1.6	3
DE1	Litsea variabilis var. oblonga	Lauraceae	Litsea	1	2.5
DE1	Metadina trichotoma	Rubiaceae	Metadina	1	3
DE1	Litsea variabilis var. oblonga	Lauraceae	Litsea	2.8	5.5
DE1	Ardisia thyrsiflora	Primulaceae	Ardisia	1.1	2.5
DE1	Ficus hispida	Moraceae	Ficus	1.9	4.5
DE1	Metadina trichotoma	Rubiaceae	Metadina	1.5	3.5
DE1	Metadina trichotoma	Rubiaceae	Metadina	1.3	3
DE1	Antidesma japonicum	Phyllanthaceae	Antidesma	1.5	3
DE1	Metadina trichotoma	Rubiaceae	Metadina	1.3	3
DE1	Litsea variabilis var. oblonga	Lauraceae	Litsea	2.3	5
DE1	Ficus auriculata	Moraceae	Ficus	19	11
DE1	Metadina trichotoma	Rubiaceae	Metadina	1.4	3
DE1	Metadina trichotoma	Rubiaceae	Metadina	1.5	3
DE1	Litsea variabilis var. oblonga	Lauraceae	Litsea	1.6	3.5
DE1	Litsea variabilis var. oblonga	Lauraceae	Litsea	2.7	4.5
DE1	Litsea variabilis var. oblonga	Lauraceae	Litsea	1.2	3
DE1	Saurauia tristyla	Actinidiaceae	Saurauia	1.5	3.5
DE1	Ficus cyrtophylla	Moraceae	Ficus	13.8	10
DE1	Metadina trichotoma	Rubiaceae	Metadina	1.3	3
DE1	Litsea variabilis var. oblonga	Lauraceae	Litsea	3.3	5
DE1	Metadina trichotoma	Rubiaceae	Metadina	1.6	2
DE1	Metadina trichotoma	Rubiaceae	Metadina	1.1	2.5
DE1	Metadina trichotoma	Rubiaceae	Metadina	1.7	4
DE1	Metadina trichotoma	Rubiaceae	Metadina	1.8	2.5
DE1	Litsea variabilis var. oblonga	Lauraceae	Litsea	2.5	4.5
DE1	Ficus hispida	Moraceae	Ficus	1.5	3.5
DE1	Metadina trichotoma	Rubiaceae	Metadina	1.5	3.5
DE1	Metadina trichotoma	Rubiaceae	Metadina	1.1	3
DE1	Metadina trichotoma	Rubiaceae	Metadina	1.1	3.5
DE1	Metadina trichotoma	Rubiaceae	Metadina	1.6	3.5
DE1	Litsea variabilis var. oblonga	Lauraceae	Litsea	1	3
DE1	Metadina trichotoma	Rubiaceae	Metadina	1	3
DE1	Metadina trichotoma	Rubiaceae	Metadina	1.1	3
DE1	Metadina trichotoma	Rubiaceae	Metadina	1.1	3
DE1	Metadina trichotoma	Rubiaceae	Metadina	1.3	2.5
DE1	Metadina trichotoma	Rubiaceae	Metadina	1	2.5
DE1	Litsea variabilis var. oblonga	Lauraceae	Litsea	1.6	3
DE1	Litsea variabilis var. oblonga	Lauraceae	Litsea	1.5	3.5
DE1	Litsea variabilis var. oblonga	Lauraceae	Litsea	2.3	4
DE1	Ficus cyrtophylla	Moraceae	Ficus	18.4	8
DE1	Euonymus dielsianus	Celastraceae	Euonymus	1.6	4
DE1	Antidesma bunius	Phyllanthaceae	Antidesma	1.7	4
DE1	Metadina trichotoma	Rubiaceae	Metadina	2.8	5
DE1	Litsea variabilis var. oblonga	Lauraceae	Litsea	2.5	5
DE1	Metadina trichotoma	Rubiaceae	Metadina	1.1	3
DE1	Metadina trichotoma	Rubiaceae	Metadina	1.4	3.5
DE1	Bischofia javanica	Phyllanthaceae	Bischofia	4.4	4
DE1	Metadina trichotoma	Rubiaceae	Metadina	1.3	3
DE1	Deutzianthus tonkinensis	Euphorbiaceae	Deutzianthus	20.7	14
DE1	Metadina trichotoma	Rubiaceae	Metadina	1.4	3
DE1	Ficus hispida	Moraceae	Ficus	1	2
DE1	Ficus hispida	Moraceae	Ficus	1.3	2
DE1	Deutzianthus tonkinensis	Euphorbiaceae	Deutzianthus	2.8	4
DE1	Litsea variabilis var. oblonga	Lauraceae	Litsea	1.7	2.5
DE1	Metadina trichotoma	Rubiaceae	Metadina	1.1	2
DE1	Litsea variabilis var. oblonga	Lauraceae	Litsea	3.8	5
DE1	Metadina trichotoma	Rubiaceae	Metadina	2	4
DE1	Saurauia tristyla	Actinidiaceae	Saurauia	4.5	4
DE1	Metadina trichotoma	Rubiaceae	Metadina	1.8	4
DE1	Ficus hispida	Moraceae	Ficus	1.5	3
DE1	Metadina trichotoma	Rubiaceae	Metadina	2.1	4
DE1	Heteropanax fragrans	Araliaceae	Heteropanax	20.9	15
DE1	Firmiana simplex	Malvaceae	Firmiana	2.2	4.5
DE1	Litsea variabilis var. oblonga	Lauraceae	Litsea	1.7	4
DE1	Metadina trichotoma	Rubiaceae	Metadina	1.2	3
DE1	Metadina trichotoma	Rubiaceae	Metadina	1.2	3.5
DE1	Metadina trichotoma	Rubiaceae	Metadina	1.1	3
DE1	Macaranga denticulata	Euphorbiaceae	Macaranga	25.7	16
DE1	Ficus hispida	Moraceae	Ficus	1.9	4.5
DE1	Ficus hispida	Moraceae	Ficus	1.9	4
DE1	Metadina trichotoma	Rubiaceae	Metadina	1.5	4
DE1	Metadina trichotoma	Rubiaceae	Metadina	1.7	4
DE1	Ficus hispida	Moraceae	Ficus	1.4	4
DE1	Metadina trichotoma	Rubiaceae	Metadina	1.6	4
DE1	Leea indica	Vitaceae	Leea	1.9	5
DE1	Litsea variabilis var. oblonga	Lauraceae	Litsea	3.7	5.5
DE1	Bennettiodendron leprosipes	Salicaceae	Bennettiodendron	2.5	4
DE1	Litsea variabilis var. oblonga	Lauraceae	Litsea	4.6	6
DE1	Metadina trichotoma	Rubiaceae	Metadina	1.6	3.5
DE1	Ficus hispida	Moraceae	Ficus	1.5	2.5
DE1	Litsea variabilis var. oblonga	Lauraceae	Litsea	2	5
DE1	Metadina trichotoma	Rubiaceae	Metadina	2.4	5
DE1	Leea indica	Vitaceae	Leea	3.4	5
DE1	Ficus hispida	Moraceae	Ficus	1.9	5
DE1	Litsea variabilis var. oblonga	Lauraceae	Litsea	2.2	4.5
DE1	Sterculia monosperma	Malvaceae	Sterculia	12.9	9
DE1	Metadina trichotoma	Rubiaceae	Metadina	1.8	5
DE1	Metadina trichotoma	Rubiaceae	Metadina	1.2	4
DE1	Metadina trichotoma	Rubiaceae	Metadina	1.2	4
DE1	Ficus hispida	Moraceae	Ficus	3.4	6.5
DE1	Metadina trichotoma	Rubiaceae	Metadina	2.1	4
DE1	Metadina trichotoma	Rubiaceae	Metadina	1.9	4
DE1	Caryota obtusa	Arecaceae	Caryota	10.8	8
DE1	Deutzianthus tonkinensis	Euphorbiaceae	Deutzianthus	4.4	5.5
DE1	Metadina trichotoma	Rubiaceae	Metadina	1.1	2.8
DE2	Ficus cyrtophylla	Moraceae	Ficus	16.8	9
DE2	Ficus hispida	Moraceae	Ficus	1.8	4.5
DE2	Litsea variabilis var. oblonga	Lauraceae	Litsea	2.2	3
DE2	Metadina trichotoma	Rubiaceae	Metadina	1.5	3
DE2	Metadina trichotoma	Rubiaceae	Metadina	3.2	3.5
DE2	Metadina trichotoma	Rubiaceae	Metadina	1	2
DE2	Metadina trichotoma	Rubiaceae	Metadina	1.6	3
DE2	Metadina trichotoma	Rubiaceae	Metadina	1.6	3
DE2	Litsea variabilis var. oblonga	Lauraceae	Litsea	3	5.5
DE2	Ficus hispida	Moraceae	Ficus	2	4
DE2	Metadina trichotoma	Rubiaceae	Metadina	1	2.5
DE2	Metadina trichotoma	Rubiaceae	Metadina	1	2.5
DE2	Metadina trichotoma	Rubiaceae	Metadina	1.6	2
DE2	Litsea variabilis var. oblonga	Lauraceae	Litsea	1.6	2.5
DE2	Archidendron eberhardtii	Fabaceae	Archidendron	16	11
DE2	Dendrocnide urentissima	Urticaceae	Dendrocnide	19	11
DE2	Ficus hispida	Moraceae	Ficus	4	6
DE2	Bennettiodendron leprosipes	Salicaceae	Bennettiodendron	2.1	2
DE2	Metadina trichotoma	Rubiaceae	Metadina	1.3	3
DE2	Capparis subsessilis	Capparaceae	Capparis	1.8	3
DE2	Acalypha kerrii	Euphorbiaceae	Acalypha	3.2	4
DE2	Tetrapanax papyrifer	Araliaceae	Tetrapanax	13.3	12
DE2	Streblus tonkinensis	Moraceae	Streblus	4.3	5.5
DE2	Streblus tonkinensis	Moraceae	Streblus	11	8
DE2	Acalypha kerrii	Euphorbiaceae	Acalypha	1.5	3
DE2	Sterculia monosperma	Malvaceae	Sterculia	4.9	4
DE2	Litsea variabilis var. oblonga	Lauraceae	Litsea	4.1	4
DE2	Ficus cyrtophylla	Moraceae	Ficus	1.7	2.5
DE2	Strophioblachia fimbricalyx	Euphorbiaceae	Strophioblachia	2.2	3
DE2	Euonymus actinocarpus	Celastraceae	Euonymus	1.5	3
DE2	Capparis subsessilis	Capparaceae	Capparis	4	4.5
DE2	Tetrapanax papyrifer	Araliaceae	Tetrapanax	8.7	7
DE2	Litsea variabilis var. oblonga	Lauraceae	Litsea	4.1	5.5
DE2	Strophioblachia fimbricalyx	Euphorbiaceae	Strophioblachia	1.7	2
DE2	Strophioblachia fimbricalyx	Euphorbiaceae	Strophioblachia	1.3	2
DE2	Streblus tonkinensis	Moraceae	Streblus	2.3	4
DE2	Strophioblachia fimbricalyx	Euphorbiaceae	Strophioblachia	1	2
DE2	Diospyros kaki var. silvestris	Ebenaceae	Diospyros	9.1	8.5
DE2	Ficus cyrtophylla	Moraceae	Ficus	7.5	7
DE2	Ficus hispida	Moraceae	Ficus	12.2	11
DE2	Ficus hispida	Moraceae	Ficus	4.2	2
DE2	Ficus hispida	Moraceae	Ficus	7.2	8.5
DE2	Metadina trichotoma	Rubiaceae	Metadina	1.9	3
DE2	Streblus tonkinensis	Moraceae	Streblus	1.7	3
DE2	Strophioblachia fimbricalyx	Euphorbiaceae	Strophioblachia	1.5	2
DE2	Ficus hispida	Moraceae	Ficus	2.8	7
DE2	Litsea variabilis var. oblonga	Lauraceae	Litsea	1.3	2
DE2	Litsea variabilis var. oblonga	Lauraceae	Litsea	2.7	5
DE2	Ficus hispida	Moraceae	Ficus	4.2	6.5
DE2	Ficus hispida	Moraceae	Ficus	3	6.5
DE2	Bennettiodendron leprosipes	Salicaceae	Bennettiodendron	1	2
DE2	Bennettiodendron leprosipes	Salicaceae	Bennettiodendron	1	2
DE2	Metadina trichotoma	Rubiaceae	Metadina	1.7	2.5
DE2	Acalypha kerrii	Euphorbiaceae	Acalypha	2.8	3
DE2	Ficus hispida	Moraceae	Ficus	1.7	4
DE2	Litsea variabilis var. oblonga	Lauraceae	Litsea	1.7	3
DE2	Streblus tonkinensis	Moraceae	Streblus	1	2
DE2	Litsea variabilis var. oblonga	Lauraceae	Litsea	1	2
DE2	Ficus hispida	Moraceae	Ficus	1.1	2
DE2	Ficus hispida	Moraceae	Ficus	1.7	4
DE2	Metadina trichotoma	Rubiaceae	Metadina	1.1	2
DE2	Ficus cyrtophylla	Moraceae	Ficus	1.7	3
DE2	Ficus hispida	Moraceae	Ficus	1.3	2
DE2	Metadina trichotoma	Rubiaceae	Metadina	1.6	2.5
DE2	Ficus hispida	Moraceae	Ficus	2.2	4
DE2	Litsea variabilis var. oblonga	Lauraceae	Litsea	3.2	5
DE2	Ficus hispida	Moraceae	Ficus	7.5	8
DE2	Ficus hispida	Moraceae	Ficus	2.3	4
DE2	Ficus hispida	Moraceae	Ficus	1.7	2
DE2	Ficus hispida	Moraceae	Ficus	2.3	4
DE2	Metadina trichotoma	Rubiaceae	Metadina	1.3	2.5
DE2	Metadina trichotoma	Rubiaceae	Metadina	1.4	2.5
DE2	Litsea variabilis var. oblonga	Lauraceae	Litsea	2.4	4.5
DE2	Litsea variabilis var. oblonga	Lauraceae	Litsea	2.8	3.5
DE2	Metadina trichotoma	Rubiaceae	Metadina	1.3	2.5
DE2	Ficus hispida	Moraceae	Ficus	1.3	2
DE2	Metadina trichotoma	Rubiaceae	Metadina	1	2
DE2	Ficus hispida	Moraceae	Ficus	1.1	2
DE2	Ficus hispida	Moraceae	Ficus	2.9	5
DE2	Litsea variabilis var. oblonga	Lauraceae	Litsea	1.9	3.5
DE2	Tetrapanax papyrifer	Araliaceae	Tetrapanax	10.5	9
DE2	Litsea variabilis var. oblonga	Lauraceae	Litsea	3.3	5
DE2	Ficus hispida	Moraceae	Ficus	8.5	7.5
DE2	Firmiana simplex	Malvaceae	Firmiana	1.1	2.5
DE2	Litsea variabilis var. oblonga	Lauraceae	Litsea	2.2	2.5
DE2	Metadina trichotoma	Rubiaceae	Metadina	2	4
DE2	Bischofia javanica	Phyllanthaceae	Bischofia	10.6	8
DE2	Metadina trichotoma	Rubiaceae	Metadina	2.9	4.4
DE2	Litsea variabilis var. oblonga	Lauraceae	Litsea	1.3	3.5
DE2	Ficus hispida	Moraceae	Ficus	2	2
DE2	Litsea variabilis var. oblonga	Lauraceae	Litsea	3.2	5
DE2	Ficus hispida	Moraceae	Ficus	6.4	6.5
DE2	Metadina trichotoma	Rubiaceae	Metadina	0.9	2
DE2	Litsea variabilis var. oblonga	Lauraceae	Litsea	2.8	4
DE2	Leea indica	Vitaceae	Leea	2.2	4
DE2	Metadina trichotoma	Rubiaceae	Metadina	2.2	3.5
DE2	Firmiana simplex	Malvaceae	Firmiana	4	6.5
DE2	Litsea variabilis var. oblonga	Lauraceae	Litsea	1.5	4
DE2	Litsea variabilis var. oblonga	Lauraceae	Litsea	0.9	2
DE2	Metadina trichotoma	Rubiaceae	Metadina	1.5	3.5
DE2	Ficus hispida	Moraceae	Ficus	10.4	8.5
DE2	Litsea variabilis var. oblonga	Lauraceae	Litsea	1.7	4
DE2	Metadina trichotoma	Rubiaceae	Metadina	3.1	4
DE2	Tilia endochrysea	Malvaceae	Tilia	18.9	16
DE2	Litsea variabilis var. oblonga	Lauraceae	Litsea	3.3	5
DE2	Streblus tonkinensis	Moraceae	Streblus	1.7	3
DE2	Bischofia javanica	Phyllanthaceae	Bischofia	6.1	7.5
DE2	Litsea variabilis var. oblonga	Lauraceae	Litsea	4	6.5
DE2	Pygeum topengii	Rosaceae	Pygeum	17	14
DE2	Litsea variabilis var. oblonga	Lauraceae	Litsea	1.2	2
DE2	Metadina trichotoma	Rubiaceae	Metadina	1.9	3.5
DE2	Litsea variabilis var. oblonga	Lauraceae	Litsea	2.9	4.5
DE2	Litsea variabilis var. oblonga	Lauraceae	Litsea	2.3	3
DE2	Metadina trichotoma	Rubiaceae	Metadina	1.3	2
DE2	Litsea variabilis var. oblonga	Lauraceae	Litsea	3	4
DE2	Litsea variabilis var. oblonga	Lauraceae	Litsea	1.2	2
DE2	Metadina trichotoma	Rubiaceae	Metadina	1.2	2.5
DE2	Heteropanax fragrans	Araliaceae	Heteropanax	24	17
DE2	Litsea variabilis var. oblonga	Lauraceae	Litsea	1.1	2
DE2	Litsea variabilis var. oblonga	Lauraceae	Litsea	1.4	2.5
DE2	Metadina trichotoma	Rubiaceae	Metadina	1.2	2.5
DE2	Ardisia thyrsiflora	Primulaceae	Ardisia	1.9	3
DE2	Clerodendrum wallichii	Lamiaceae	Clerodendrum	1.5	2.5
DE2	Streblus tonkinensis	Moraceae	Streblus	1.1	2
DE2	Streblus tonkinensis	Moraceae	Streblus	3.4	5
DE2	Metadina trichotoma	Rubiaceae	Metadina	1.8	3
DE2	Clerodendrum wallichii	Lamiaceae	Clerodendrum	1	2
DE2	Strophioblachia fimbricalyx	Euphorbiaceae	Strophioblachia	1.4	2
DE2	Litsea variabilis var. oblonga	Lauraceae	Litsea	6.6	7.5
DE2	Heteropanax fragrans	Araliaceae	Heteropanax	0.9	2
DE2	Cipadessa baccifera	Meliaceae	Cipadessa	6.8	8
DE2	Acalypha kerrii	Euphorbiaceae	Acalypha	1.7	4
DE2	Acalypha kerrii	Euphorbiaceae	Acalypha	1.3	3
DE2	Ficus hispida	Moraceae	Ficus	3.3	5
DE2	Tilia endochrysea	Malvaceae	Tilia	16.9	15
DE2	Litsea variabilis var. oblonga	Lauraceae	Litsea	4.5	5.5
DE2	Clerodendrum wallichii	Lamiaceae	Clerodendrum	2	3.5
DE2	Tetrapanax papyrifer	Araliaceae	Tetrapanax	8.3	7
DE2	Litsea variabilis var. oblonga	Lauraceae	Litsea	2.2	3.5
DE2	Antidesma bunius	Phyllanthaceae	Antidesma	1.1	2
DE2	Streblus tonkinensis	Moraceae	Streblus	7.7	6.5
DE2	Streblus tonkinensis	Moraceae	Streblus	1.9	2.5
DE2	Litsea variabilis var. oblonga	Lauraceae	Litsea	4.2	4.5
DE2	Litsea variabilis var. oblonga	Lauraceae	Litsea	2	4
DE2	Metadina trichotoma	Rubiaceae	Metadina	1.9	2
DE2	Litsea variabilis var. oblonga	Lauraceae	Litsea	1.2	2
DE2	Metadina trichotoma	Rubiaceae	Metadina	1	2
DE2	Strophioblachia fimbricalyx	Euphorbiaceae	Strophioblachia	1	2
DE2	Metadina trichotoma	Rubiaceae	Metadina	1.7	2.5
DE2	Strophioblachia fimbricalyx	Euphorbiaceae	Strophioblachia	2.1	2.5
DE2	Sterculia monosperma	Malvaceae	Sterculia	9.9	11
DE2	Acalypha kerrii	Euphorbiaceae	Acalypha	3.5	6
DE2	Streblus tonkinensis	Moraceae	Streblus	7.4	7.5
DE2	Diospyros dumetorum	Ebenaceae	Diospyros	2.1	2.5
DE2	Sterculia monosperma	Malvaceae	Sterculia	9.3	9
DE2	Streblus tonkinensis	Moraceae	Streblus	2.4	4
DE2	Streblus tonkinensis	Moraceae	Streblus	3.1	2.5
DE2	Capparis subsessilis	Capparaceae	Capparis	1.2	2
DE2	Streblus tonkinensis	Moraceae	Streblus	15.5	7.5
DE2	Litsea variabilis var. oblonga	Lauraceae	Litsea	1.6	2.5
DE2	Sterculia monosperma	Malvaceae	Sterculia	20.3	11
DE2	Streblus tonkinensis	Moraceae	Streblus	1.3	2
DE2	Streblus tonkinensis	Moraceae	Streblus	2.3	4
DE2	Litsea variabilis var. oblonga	Lauraceae	Litsea	2.7	2
DE2	Acalypha kerrii	Euphorbiaceae	Acalypha	1.4	2
DE2	Streblus tonkinensis	Moraceae	Streblus	4.2	5
DE2	Metadina trichotoma	Rubiaceae	Metadina	1	2
DE2	Macaranga denticulata	Euphorbiaceae	Macaranga	24.2	15
DE2	Streblus tonkinensis	Moraceae	Streblus	3.5	4
DE2	Vitex kwangsiensis	Lamiaceae	Vitex	18.1	7
DE2	Bennettiodendron leprosipes	Salicaceae	Bennettiodendron	1.8	2
DE2	Litsea variabilis var. oblonga	Lauraceae	Litsea	1.9	2
DE2	Litsea variabilis var. oblonga	Lauraceae	Litsea	3.5	5
DE2	Ficus hispida	Moraceae	Ficus	1	2
DE2	Ficus hispida	Moraceae	Ficus	1.9	4
DE2	Ficus hispida	Moraceae	Ficus	4.1	5
DE2	Litsea variabilis var. oblonga	Lauraceae	Litsea	1.3	2
DE2	Ficus hispida	Moraceae	Ficus	6.4	6.5
DE2	Ficus hispida	Moraceae	Ficus	1.3	2
DE2	Ficus hispida	Moraceae	Ficus	1.3	2
DE2	Ficus hispida	Moraceae	Ficus	1.7	4
DE2	Litsea variabilis var. oblonga	Lauraceae	Litsea	2.6	3.5
DE2	Ficus hispida	Moraceae	Ficus	9.9	8
DE2	Ficus hispida	Moraceae	Ficus	1.7	4
DE2	Litsea variabilis var. oblonga	Lauraceae	Litsea	2	4
DE2	Ficus hispida	Moraceae	Ficus	1.3	2
DE2	Ficus hispida	Moraceae	Ficus	3.4	5
DE2	Caryota obtusa	Arecaceae	Caryota	14.8	8
DE2	Bennettiodendron leprosipes	Salicaceae	Bennettiodendron	3.1	4
DE2	Metadina trichotoma	Rubiaceae	Metadina	1.1	2
DE2	Litsea variabilis var. oblonga	Lauraceae	Litsea	2	3.5
DE2	Litsea variabilis var. oblonga	Lauraceae	Litsea	1.9	2.5
DE2	Ficus hispida	Moraceae	Ficus	1.5	2
DE2	Ficus hispida	Moraceae	Ficus	10.8	8
DE2	Metadina trichotoma	Rubiaceae	Metadina	1	2
DE2	Metadina trichotoma	Rubiaceae	Metadina	1.6	2
DE2	Litsea variabilis var. oblonga	Lauraceae	Litsea	1.5	3
DE2	Streblus tonkinensis	Moraceae	Streblus	2.7	3.5
DE2	Litsea variabilis var. oblonga	Lauraceae	Litsea	5.2	6
DE2	Litsea variabilis var. oblonga	Lauraceae	Litsea	1	2
DE2	Metadina trichotoma	Rubiaceae	Metadina	1.6	2.5
DE2	Litsea variabilis var. oblonga	Lauraceae	Litsea	2.7	4
DE2	Caryota obtusa	Arecaceae	Caryota	3.2	5
DE3	Leea indica	Vitaceae	Leea	1.7	3.5
DE3	Ficus hispida	Moraceae	Ficus	3	3.8
DE3	Leea indica	Vitaceae	Leea	1.6	2.6
DE3	Ficus oligodon	Moraceae	Ficus	6.6	5
DE3	Tetrastigma planicaule	Vitaceae	Tetrastigma	2.4	19
DE3	Gnetum montanum	Gnetaceae	Gnetum	2.2	15
DE3	Tetrastigma planicaule	Vitaceae	Tetrastigma	3.4	14
DE3	Sterculia lanceolata	Malvaceae	Sterculia	14	8.5
DE3	Ficus hispida	Moraceae	Ficus	2.1	4.3
DE3	Ficus hispida	Moraceae	Ficus	1.5	3.8
DE3	Ficus hispida	Moraceae	Ficus	1.6	3.5
DE3	Gnetum montanum	Gnetaceae	Gnetum	2.3	15
DE3	Ficus hispida	Moraceae	Ficus	1.4	3.4
DE3	Ficus oligodon	Moraceae	Ficus	3.6	4.6
DE3	Ficus hispida	Moraceae	Ficus	1.4	2.1
DE3	Ficus hispida	Moraceae	Ficus	2	3.5
DE3	Ficus hispida	Moraceae	Ficus	1.4	2.6
DE3	Ficus hispida	Moraceae	Ficus	7.4	6.2
DE3	Antidesma bunius	Phyllanthaceae	Antidesma	1.3	2
DE3	Sterculia lanceolata	Malvaceae	Sterculia	12.8	7.5
DE3	Ficus hispida	Moraceae	Ficus	6.6	5.5
DE3	Ficus hispida	Moraceae	Ficus	1.4	1.9
DE3	Ficus hispida	Moraceae	Ficus	1.5	2.8
DE3	Catunaregam spinosa	Rubiaceae	Catunaregam	3.5	4.2
DE3	Vitex kwangsiensis	Lamiaceae	Vitex	10.8	7.8
DE3	Leea indica	Vitaceae	Leea	1.4	2.5
DE3	Sterculia lanceolata	Malvaceae	Sterculia	1.4	2.1
DE3	Ficus hispida	Moraceae	Ficus	1.3	2
DE3	Ficus hispida	Moraceae	Ficus	3.5	5.2
DE3	Ficus hispida	Moraceae	Ficus	1.2	2.4
DE3	Ficus hispida	Moraceae	Ficus	1.4	3.2
DE3	Ficus hispida	Moraceae	Ficus	1.7	3.8
DE3	Litsea glutinosa	Lauraceae	Litsea	5.4	6.3
DE3	Ficus hispida	Moraceae	Ficus	7.4	6.5
DE3	Ficus hispida	Moraceae	Ficus	1.4	3.2
DE3	Embelia laeta	Primulaceae	Embelia	3.5	19
DE3	Tetrastigma planicaule	Vitaceae	Tetrastigma	3.3	16
DE3	Gnetum montanum	Gnetaceae	Gnetum	2.3	15
DE3	Maesa perlarius	Primulaceae	Maesa	2.1	2.2
DE3	Gnetum montanum	Gnetaceae	Gnetum	2.3	19
DE3	Ficus hispida	Moraceae	Ficus	1.6	4
DE3	Ficus hispida	Moraceae	Ficus	1.3	3
DE3	Vitex kwangsiensis	Lamiaceae	Vitex	12.9	7
DE3	Embelia laeta	Primulaceae	Embelia	3.3	22
DE3	Leea indica	Vitaceae	Leea	2.8	6.5
DE3	Ficus hispida	Moraceae	Ficus	1.4	2
DE3	Ficus hispida	Moraceae	Ficus	1.9	4
DE3	Ficus hispida	Moraceae	Ficus	1.8	4.2
DE3	Ficus hispida	Moraceae	Ficus	1.5	3.3
DE3	Ficus hispida	Moraceae	Ficus	1.4	2.7
DE3	Gnetum montanum	Gnetaceae	Gnetum	3.9	1.7
DE3	Ficus hispida	Moraceae	Ficus	1.4	3.6
DE3	Ficus hispida	Moraceae	Ficus	1.4	2.5
DE3	Ficus hispida	Moraceae	Ficus	1.4	2.5
DE3	Ficus hispida	Moraceae	Ficus	1.4	3.6
DE3	Premna fulva	Lamiaceae	Premna	1.9	18
DE3	Antidesma bunius	Phyllanthaceae	Antidesma	2.4	3.5
DE3	Tetrastigma planicaule	Vitaceae	Tetrastigma	2.1	19
DE3	Ficus oligodon	Moraceae	Ficus	2.8	2.5
DE3	Orophea polycarpa	Annonaceae	Orophea	1.8	2.4
DE3	Tetrastigma planicaule	Vitaceae	Tetrastigma	2.1	20
DE3	Ficus hispida	Moraceae	Ficus	1.4	2.3
DE3	Litsea variabilis var. oblonga	Lauraceae	Litsea	1.4	2.2
DE3	Desmos chinensis	Annonaceae	Desmos	8.2	6
DE3	Rubus_sp1	Rosaceae	Rubus	1.6	21
DE3	Markhamia stipulata	Bignoniaceae	Markhamia	16.5	10.5
DE3	Ficus oligodon	Moraceae	Ficus	3.4	4.5
DE3	Gnetum montanum	Gnetaceae	Gnetum	2.8	22
DE3	Orophea polycarpa	Annonaceae	Orophea	5.9	2
DE3	Selaginella_sp1	Selaginellaceae	Selaginella	1.4	23
DE3	Orophea polycarpa	Annonaceae	Orophea	2.3	3.8
DE3	Ficus oligodon	Moraceae	Ficus	25.5	11
DE3	Tetrastigma planicaule	Vitaceae	Tetrastigma	5.5	20
DE3	Orophea polycarpa	Annonaceae	Orophea	2.4	2.2
DE3	Alphonsea monogyna	Annonaceae	Alphonsea	2.9	4.2
DE3	Litsea variabilis var. oblonga	Lauraceae	Litsea	1.4	2.2
DE3	Desmos chinensis	Annonaceae	Desmos	1.3	2.5
DE3	Orophea polycarpa	Annonaceae	Orophea	1.8	3.1
DE3	Capparis urophylla	Capparaceae	Capparis	2.9	3.2
DE3	Desmos chinensis	Annonaceae	Desmos	1.8	1.6
DE3	Ficus hispida	Moraceae	Ficus	1.6	3.4
DE3	Ficus hispida	Moraceae	Ficus	1.4	2.6
DE3	Ficus hispida	Moraceae	Ficus	1.5	3.2
DE3	Ficus hispida	Moraceae	Ficus	1.6	3.1
DE3	Ficus hispida	Moraceae	Ficus	1.6	2.8
DE3	Ficus hispida	Moraceae	Ficus	1.7	2.8
DE3	Ficus hispida	Moraceae	Ficus	1.5	2.6
DE3	Ficus hispida	Moraceae	Ficus	1.6	2.5
DE3	Antidesma bunius	Phyllanthaceae	Antidesma	1.7	2.3
DE3	Ficus hispida	Moraceae	Ficus	1.6	3
DE3	Ficus hispida	Moraceae	Ficus	2.3	3
DE3	Ficus hispida	Moraceae	Ficus	2.3	3
DE3	Ficus hispida	Moraceae	Ficus	1.6	3.2
DE3	Ficus hispida	Moraceae	Ficus	2.1	3.2
DE3	Maesa perlarius	Primulaceae	Maesa	2.9	3.2
DE3	Ficus hispida	Moraceae	Ficus	1.6	2.3
DE3	Ficus hispida	Moraceae	Ficus	1.3	2.4
DE3	Litsea variabilis var. oblonga	Lauraceae	Litsea	3.1	2.6
DE3	Oroxylum indicum	Bignoniaceae	Oroxylum	24.4	10
DE3	Ficus oligodon	Moraceae	Ficus	10.9	8.2
DE3	Oroxylum indicum	Bignoniaceae	Oroxylum	28.6	8.5
DE3	Euonymus	Celastraceae	Euonymus	3.3	21
DE3	Maesa perlarius	Primulaceae	Maesa	1.5	2.5
DE3	Trevesia palmata	Araliaceae	Trevesia	9.3	6.2
DE3	Ficus hispida	Moraceae	Ficus	1.6	3.1
DE3	Leea indica	Vitaceae	Leea	4.1	2.8
DE3	Leea indica	Vitaceae	Leea	3.3	3.2
DE3	Leea indica	Vitaceae	Leea	3.7	3.6
DE3	Glochidion coccineum	Phyllanthaceae	Glochidion	2.6	2.5
DE3	Kadsura heteroclita	Schisandraceae	Kadsura	2.1	18
DE3	Rubus_sp1	Rosaceae	Rubus	2	17
DE3	Maesa perlarius	Primulaceae	Maesa	4.2	4.5
DE3	Micromelum integerrimum	Rutaceae	Micromelum	5.9	3.5
DE3	Ficus hispida	Moraceae	Ficus	5.4	3.1
DE3	Leea indica	Vitaceae	Leea	3.8	4.5
DE3	Clerodendrum wallichii	Lamiaceae	Clerodendrum	2.4	4.2
DE3	Embelia laeta	Primulaceae	Embelia	2.5	16
DE3	Cissus subtetragona	Vitaceae	Cissus	2.5	15
DE3	Ficus tinctoria subsp. gibbosa	Moraceae	Ficus	1.4	2
DE3	Vitex kwangsiensis	Lamiaceae	Vitex	17.6	6.7
DE3	Celtis timorensis	Cannabaceae	Celtis	10.1	10.5
DE3	Gnetum montanum	Gnetaceae	Gnetum	7	25
DE3	Vitex kwangsiensis	Lamiaceae	Vitex	13.4	9
DE3	Amesiodendron chinense	Sapindaceae	Amesiodendron	25.5	9.5
DE3	Litsea variabilis var. oblonga	Lauraceae	Litsea	1.4	2
DE3	Mallotus barbatus	Euphorbiaceae	Mallotus	11	8
DE3	Antidesma bunius	Phyllanthaceae	Antidesma	1.4	1.9
DE3	Adenanthera microsperma	Fabaceae	Adenanthera	1.5	7.9
DE3	Rubus_sp1	Rosaceae	Rubus	1.7	22
DE3	Diospyros siderophylla	Ebenaceae	Diospyros	1.5	2.5
DE3	Rubus_sp1	Rosaceae	Rubus	2.1	17
DE3	Tetrastigma planicaule	Vitaceae	Tetrastigma	5.9	18
DE3	Ficus hispida	Moraceae	Ficus	1.9	4
DE3	Gnetum montanum	Gnetaceae	Gnetum	3.6	16
DE3	Catunaregam spinosa	Rubiaceae	Catunaregam	4.9	6
DE3	Ficus oligodon	Moraceae	Ficus	11.8	8
DE3	Ficus hispida	Moraceae	Ficus	1.6	3
DE3	Sterculia lanceolata	Malvaceae	Sterculia	10.9	6.5
DE3	Litsea glutinosa	Lauraceae	Litsea	6.7	6.3
DE3	Ficus hispida	Moraceae	Ficus	5.5	3.5
DE3	Litsea variabilis var. oblonga	Lauraceae	Litsea	2.8	3.5
DE3	Sterculia lanceolata	Malvaceae	Sterculia	9.2	7
DE3	Litsea glutinosa	Lauraceae	Litsea	6.8	6.2
DE3	Gnetum montanum	Gnetaceae	Gnetum	5.2	19
DE3	Vitex kwangsiensis	Lamiaceae	Vitex	12.3	8
DE3	Kadsura heteroclita	Schisandraceae	Kadsura	1.2	18
DE3	Gnetum montanum	Gnetaceae	Gnetum	2.2	14
DE3	Ficus hispida	Moraceae	Ficus	1.3	2.6
DE3	Litsea glutinosa	Lauraceae	Litsea	8.2	6.6
DE3	Ficus hispida	Moraceae	Ficus	1.1	2.1
DE3	Vitex kwangsiensis	Lamiaceae	Vitex	5.3	5.5
DE3	Dracontomelon duperreanum	Anacardiaceae	Dracontomelon	20.2	8.2
DE3	Ilex rotunda	Aquifoliaceae	Ilex	8.8	7.5
DE3	Ficus hispida	Moraceae	Ficus	5.7	5
DE3	Adenanthera microsperma	Fabaceae	Adenanthera	1.7	3.8
DE3	Maesa perlarius	Primulaceae	Maesa	3	5
DE3	Micromelum integerrimum	Rutaceae	Micromelum	7	5
DE3	Maesa perlarius	Primulaceae	Maesa	1.9	2.3
DE3	Ficus hispida	Moraceae	Ficus	7.9	6
DE3	Bischofia javanica	Phyllanthaceae	Bischofia	2.5	2.5
DE3	Ficus hispida	Moraceae	Ficus	1.2	2.6
DE3	Gnetum montanum	Gnetaceae	Gnetum	2.9	17
DE3	Mallotus philippensis	Euphorbiaceae	Mallotus	1.9	2.2
DE3	Litsea glutinosa	Lauraceae	Litsea	12	7.5
DE3	Ficus hispida	Moraceae	Ficus	1.7	2.8
DE4	Vitex kwangsiensis	Lamiaceae	Vitex	20.2	7.5
DE3	Ficus hispida	Moraceae	Ficus	6.4	7
DE4	Ficus hispida	Moraceae	Ficus	3.5	6
DE4	Ficus hispida	Moraceae	Ficus	6.2	6.5
DE4	Ficus hispida	Moraceae	Ficus	1.8	4.5
DE4	Ficus hispida	Moraceae	Ficus	5.7	6
DE4	Ficus hispida	Moraceae	Ficus	3.5	5
DE4	Ficus oligodon	Moraceae	Ficus	5.6	6
DE4	Vitex kwangsiensis	Lamiaceae	Vitex	2.6	3
DE4	Ardisia thyrsiflora	Primulaceae	Ardisia	1.5	2.5
DE4	Ardisia thyrsiflora	Primulaceae	Ardisia	1.6	3
DE4	Ardisia thyrsiflora	Primulaceae	Ardisia	1	2
DE4	Leea indica	Vitaceae	Leea	3.1	5
DE4	Sterculia monosperma	Malvaceae	Sterculia	1.9	4
DE4	Ficus hispida	Moraceae	Ficus	3.5	5
DE4	Ficus hispida	Moraceae	Ficus	5.4	6.5
DE4	Glochidion ellipticum	Phyllanthaceae	Glochidion	7.1	6.5
DE4	Wendlandia uvariifolia	Rubiaceae	Wendlandia	10.1	6
DE4	Sterculia monosperma	Malvaceae	Sterculia	1.3	3
DE4	Ardisia thyrsiflora	Primulaceae	Ardisia	1.6	3
DE4	Ficus hispida	Moraceae	Ficus	1.8	3.5
DE4	Ardisia thyrsiflora	Primulaceae	Ardisia	1.2	2.5
DE4	Ardisia thyrsiflora	Primulaceae	Ardisia	1.4	2
DE4	Ficus hispida	Moraceae	Ficus	1.2	2
DE4	Ficus hispida	Moraceae	Ficus	1	2.5
DE4	Ficus oligodon	Moraceae	Ficus	17.7	10
DE4	Wendlandia uvariifolia	Rubiaceae	Wendlandia	4.6	5.5
DE4	Ficus hispida	Moraceae	Ficus	3.4	6
DE4	Ficus hispida	Moraceae	Ficus	4.7	5.5
DE4	Ardisia thyrsiflora	Primulaceae	Ardisia	1	2
DE4	Ardisia thyrsiflora	Primulaceae	Ardisia	1	2
DE4	Litsea variabilis var. oblonga	Lauraceae	Litsea	1	2
DE4	Ardisia thyrsiflora	Primulaceae	Ardisia	1.4	2.5
DE4	Ficus hispida	Moraceae	Ficus	1.5	3
DE4	Ardisia thyrsiflora	Primulaceae	Ardisia	1.1	2.5
DE4	Ficus hispida	Moraceae	Ficus	2.5	6
DE4	Wendlandia uvariifolia	Rubiaceae	Wendlandia	11.5	6.5
DE4	Deutzianthus tonkinensis	Euphorbiaceae	Deutzianthus	9.3	8
DE4	Ficus hispida	Moraceae	Ficus	4.8	7
DE4	Ficus hispida	Moraceae	Ficus	4.4	6.5
DE4	Ficus hispida	Moraceae	Ficus	5	7
DE4	Ficus hispida	Moraceae	Ficus	3.3	6
DE4	Ficus hispida	Moraceae	Ficus	1.5	4
DE4	Ardisia thyrsiflora	Primulaceae	Ardisia	1.4	2.5
DE4	Ardisia thyrsiflora	Primulaceae	Ardisia	1	2
DE4	Ardisia thyrsiflora	Primulaceae	Ardisia	1	2
DE4	Ardisia thyrsiflora	Primulaceae	Ardisia	1.4	2.5
DE4	Litsea variabilis var. oblonga	Lauraceae	Litsea	1.3	2.5
DE4	Ficus hispida	Moraceae	Ficus	1.4	3
DE4	Wendlandia uvariifolia	Rubiaceae	Wendlandia	17.8	8
DE4	Ficus hispida	Moraceae	Ficus	4.3	5.5
DE4	Ficus hispida	Moraceae	Ficus	7.5	7.5
DE4	Ficus hispida	Moraceae	Ficus	2.5	5.5
DE4	Ficus hispida	Moraceae	Ficus	2.4	5.5
DE4	Ficus hispida	Moraceae	Ficus	2.1	5.5
DE4	Ficus hispida	Moraceae	Ficus	2.7	5.5
DE4	Ficus hispida	Moraceae	Ficus	6.1	6
DE4	Ficus hispida	Moraceae	Ficus	2.4	5
DE4	Antidesma bunius	Phyllanthaceae	Antidesma	2.1	2.5
DE4	Ficus hispida	Moraceae	Ficus	3.1	5
DE4	Ficus hispida	Moraceae	Ficus	6.8	6.5
DE4	Ficus hispida	Moraceae	Ficus	1.9	4.5
DE4	Ficus hispida	Moraceae	Ficus	1.1	2.5
DE4	Ficus hispida	Moraceae	Ficus	1.5	3.5
DE4	Litsea variabilis var. oblonga	Lauraceae	Litsea	1.1	2
DE4	Litsea variabilis var. oblonga	Lauraceae	Litsea	1.5	2.5
DE4	Ardisia thyrsiflora	Primulaceae	Ardisia	1.2	2
DE4	Catunaregam spinosa	Rubiaceae	Catunaregam	1.9	3.5
DE4	Catunaregam spinosa	Rubiaceae	Catunaregam	2.6	2
DE4	Ficus hispida	Moraceae	Ficus	1.3	3.5
DE4	Ficus hispida	Moraceae	Ficus	1.5	4
DE4	Sterculia monosperma	Malvaceae	Sterculia	1.3	3
DE4	Catunaregam spinosa	Rubiaceae	Catunaregam	7.7	5
DE4	Catunaregam spinosa	Rubiaceae	Catunaregam	3.1	4.5
DE4	Grewia henryi	Malvaceae	Grewia	5.5	6
DE4	Ficus hispida	Moraceae	Ficus	2.1	5
DE4	Ficus hispida	Moraceae	Ficus	1.8	5
DE4	Ardisia thyrsiflora	Primulaceae	Ardisia	2.1	3
DE4	Ficus hispida	Moraceae	Ficus	7.1	6.5
DE4	Ficus hispida	Moraceae	Ficus	3	5
DE4	Catunaregam spinosa	Rubiaceae	Catunaregam	4.6	6
DE4	Ficus hispida	Moraceae	Ficus	4.2	5.5
DE4	Ficus hispida	Moraceae	Ficus	1.9	5.5
DE4	Ficus hispida	Moraceae	Ficus	6.5	7
DE4	Ficus hispida	Moraceae	Ficus	2.2	5
DE4	Ficus hispida	Moraceae	Ficus	4.9	7
DE4	Ficus hispida	Moraceae	Ficus	7.3	7
DE4	Ardisia thyrsiflora	Primulaceae	Ardisia	1.6	4
DE4	Ficus hispida	Moraceae	Ficus	1.3	3.5
DE4	Ficus hispida	Moraceae	Ficus	1.5	3.5
DE4	Ardisia thyrsiflora	Primulaceae	Ardisia	1.6	3
DE4	Ardisia thyrsiflora	Primulaceae	Ardisia	1.5	3
DE4	Litsea variabilis var. oblonga	Lauraceae	Litsea	1.6	3
DE4	Ficus hispida	Moraceae	Ficus	1.2	4
DE4	Ardisia thyrsiflora	Primulaceae	Ardisia	2.5	4
DE4	Ardisia thyrsiflora	Primulaceae	Ardisia	1.3	2.5
DE4	Ficus hispida	Moraceae	Ficus	6.4	8
DE4	Ficus hispida	Moraceae	Ficus	3.4	5
DE4	Ficus hispida	Moraceae	Ficus	3.6	6
DE4	Antidesma bunius	Phyllanthaceae	Antidesma	1.9	2.5
DE4	Ficus hispida	Moraceae	Ficus	3.5	5
DE4	Ficus hispida	Moraceae	Ficus	4.5	7
DE4	Ardisia thyrsiflora	Primulaceae	Ardisia	2.1	3
DE4	Ficus hispida	Moraceae	Ficus	6	6.5
DE4	Ficus hispida	Moraceae	Ficus	2.6	5
DE4	Ficus hispida	Moraceae	Ficus	4.2	6
DE4	Ardisia thyrsiflora	Primulaceae	Ardisia	1.3	2.5
DE4	Ardisia thyrsiflora	Primulaceae	Ardisia	1.2	2
DE4	Ficus hispida	Moraceae	Ficus	1.4	4
DE4	Ficus hispida	Moraceae	Ficus	2.2	5
DE4	Ficus hispida	Moraceae	Ficus	4.1	5.5
DE4	Bischofia javanica	Phyllanthaceae	Bischofia	7.4	7.5
DE4	Ficus hispida	Moraceae	Ficus	2.6	6
DE4	Deutzianthus tonkinensis	Euphorbiaceae	Deutzianthus	2.7	2.5
DE4	Ficus oligodon	Moraceae	Ficus	12	8.5
DE4	Ficus hispida	Moraceae	Ficus	7.6	6.5
DE4	Ficus hispida	Moraceae	Ficus	4.1	6
DE4	Ardisia thyrsiflora	Primulaceae	Ardisia	1.8	2.5
DE4	Ardisia thyrsiflora	Primulaceae	Ardisia	1.1	2
DE4	Ardisia thyrsiflora	Primulaceae	Ardisia	1.3	2
DE4	Ardisia thyrsiflora	Primulaceae	Ardisia	1.6	2.5
DE4	Ardisia thyrsiflora	Primulaceae	Ardisia	1.1	2
DE4	Ardisia thyrsiflora	Primulaceae	Ardisia	1.4	2.5
DE4	Ficus hispida	Moraceae	Ficus	6.6	7.5
DE4	Litsea variabilis var. oblonga	Lauraceae	Litsea	3.2	3.5
DE4	Ficus hispida	Moraceae	Ficus	5.2	6.5
DE4	Ficus hispida	Moraceae	Ficus	2.4	4.5
DE4	Ficus hispida	Moraceae	Ficus	6.7	6.5
DE4	Ficus hispida	Moraceae	Ficus	4.4	5.5
DE4	Ficus hispida	Moraceae	Ficus	3.6	6.5
DE4	Ficus hispida	Moraceae	Ficus	1.5	3.5
DE4	Litsea variabilis var. oblonga	Lauraceae	Litsea	1.6	2
DE4	Ficus hispida	Moraceae	Ficus	7	6.5
DE4	Ficus hispida	Moraceae	Ficus	5.6	6.5
DE4	Ficus hispida	Moraceae	Ficus	2.1	5
DE4	Ficus hispida	Moraceae	Ficus	3.6	6.5
DE4	Ficus hispida	Moraceae	Ficus	2	4.5
DE4	Ficus hispida	Moraceae	Ficus	1.6	2.5
DE4	Ficus hispida	Moraceae	Ficus	4.4	5.5
DE4	Ficus hispida	Moraceae	Ficus	2.6	6
DE4	Ardisia thyrsiflora	Primulaceae	Ardisia	1.2	2
DE4	Litsea variabilis var. oblonga	Lauraceae	Litsea	3.2	5
DE4	Ficus hispida	Moraceae	Ficus	2.3	4
DE4	Ficus hispida	Moraceae	Ficus	1.5	3.5
DE4	Ficus hispida	Moraceae	Ficus	1.1	3.5
DE4	Ficus hispida	Moraceae	Ficus	1.4	4
DE4	Ficus hispida	Moraceae	Ficus	1.6	4.5
DE4	Ardisia thyrsiflora	Primulaceae	Ardisia	2.4	4
DE4	Ficus hispida	Moraceae	Ficus	4	6
DE4	Ficus hispida	Moraceae	Ficus	8.2	6.5
DE4	Catunaregam spinosa	Rubiaceae	Catunaregam	3.8	4.5
DE4	Ficus hispida	Moraceae	Ficus	4.1	6.5
DE4	Ardisia thyrsiflora	Primulaceae	Ardisia	2.6	4
DE4	Ficus hispida	Moraceae	Ficus	3	5.5
DE4	Ficus hispida	Moraceae	Ficus	2.6	5
DE4	Ficus hispida	Moraceae	Ficus	2.3	5
DE4	Ficus hispida	Moraceae	Ficus	3.8	6.5
DE4	Ficus hispida	Moraceae	Ficus	2	4.5
DE4	Ficus hispida	Moraceae	Ficus	4.5	6.5
DE4	Ficus hispida	Moraceae	Ficus	5.1	6
DE4	Ficus hispida	Moraceae	Ficus	3.9	5
DE4	Ardisia thyrsiflora	Primulaceae	Ardisia	3.3	4
DE4	Ficus hispida	Moraceae	Ficus	7.3	6
DE4	Ficus hispida	Moraceae	Ficus	3.3	5.5
DE4	Ficus hispida	Moraceae	Ficus	1.9	4
DE4	Ardisia thyrsiflora	Primulaceae	Ardisia	3.2	2
DE4	Ardisia thyrsiflora	Primulaceae	Ardisia	1.6	3
DE4	Ardisia thyrsiflora	Primulaceae	Ardisia	1.7	3
DE4	Ardisia thyrsiflora	Primulaceae	Ardisia	1.2	2.5
DE4	Ficus hispida	Moraceae	Ficus	1.7	3
DE4	Ficus hispida	Moraceae	Ficus	2.5	4.5
DE4	Ficus hispida	Moraceae	Ficus	5.7	8
DE4	Ficus hispida	Moraceae	Ficus	5.9	6
DE4	Ficus hispida	Moraceae	Ficus	3.8	5
DE4	Ficus hispida	Moraceae	Ficus	2	4.5
DE4	Wendlandia uvariifolia	Rubiaceae	Wendlandia	11.9	6.5
DE4	Ficus hispida	Moraceae	Ficus	3.6	6.5
DE4	Sterculia monosperma	Malvaceae	Sterculia	10.6	7.5
DE4	Glochidion ellipticum	Phyllanthaceae	Glochidion	6.5	6
DE4	Ficus hispida	Moraceae	Ficus	6.5	6.5
DE4	Ficus hispida	Moraceae	Ficus	4.8	6
DE4	Ficus hispida	Moraceae	Ficus	3.6	6.5
DE4	Radermachera frondosa	Bignoniaceae	Radermachera	13.5	6.5
DE4	Ficus hispida	Moraceae	Ficus	2.1	5
DE4	Ficus hispida	Moraceae	Ficus	3.3	5.5
DE4	Ficus hispida	Moraceae	Ficus	2.8	6
DE4	Ficus hispida	Moraceae	Ficus	2.7	6
DE4	Catunaregam spinosa	Rubiaceae	Catunaregam	2.6	3
DE4	Ficus hispida	Moraceae	Ficus	3.4	5.5
DE4	Ficus hispida	Moraceae	Ficus	6.4	6.5
DE4	Ficus hispida	Moraceae	Ficus	2	4
DE4	Litsea variabilis var. oblonga	Lauraceae	Litsea	1.6	3
DE4	Ficus hispida	Moraceae	Ficus	1.6	4.5
DE4	Ardisia thyrsiflora	Primulaceae	Ardisia	2	2.5
DE4	Sterculia monosperma	Malvaceae	Sterculia	2	2.5
DE4	Ardisia thyrsiflora	Primulaceae	Ardisia	1.8	2
DE4	Ficus hispida	Moraceae	Ficus	1.3	3.5
DE4	Radermachera frondosa	Bignoniaceae	Radermachera	4.8	5
DE4	Catunaregam spinosa	Rubiaceae	Catunaregam	5.3	4
DE4	Ficus hispida	Moraceae	Ficus	4.2	6.5
DE4	Glochidion ellipticum	Phyllanthaceae	Glochidion	3.9	4
DE4	Ficus hispida	Moraceae	Ficus	5.7	6.5
DE4	Ficus hispida	Moraceae	Ficus	7.3	6.5
DE4	Ficus hispida	Moraceae	Ficus	2.8	5
DE4	Ficus hispida	Moraceae	Ficus	4.3	6
DE4	Ficus hispida	Moraceae	Ficus	6.8	7
DE4	Ardisia thyrsiflora	Primulaceae	Ardisia	2.1	3
DE4	Litsea variabilis var. oblonga	Lauraceae	Litsea	2.6	3
DE4	Litsea variabilis var. oblonga	Lauraceae	Litsea	1.6	3
DE4	Ficus hispida	Moraceae	Ficus	2.1	5
DE4	Litsea variabilis var. oblonga	Lauraceae	Litsea	1.2	3
DE4	Ficus hispida	Moraceae	Ficus	3.4	4.5
DE4	Ficus hispida	Moraceae	Ficus	3.2	3
DE4	Ficus hispida	Moraceae	Ficus	6.6	6.5
DE4	Ficus hispida	Moraceae	Ficus	3.6	5
DE4	Ficus hispida	Moraceae	Ficus	4.1	5
DE4	Radermachera frondosa	Bignoniaceae	Radermachera	5.5	6.5
DE4	Ficus hispida	Moraceae	Ficus	3	5.5
DE4	Cratoxylum formosum subsp. pruniflorum	Hypericaceae	Cratoxylum	9.8	5.5
DE4	Litsea variabilis var. oblonga	Lauraceae	Litsea	1.3	3
DE4	Ardisia thyrsiflora	Primulaceae	Ardisia	1.4	2.5
DE4	Litsea variabilis var. oblonga	Lauraceae	Litsea	2	3.5
DE4	Ficus hispida	Moraceae	Ficus	1.8	4
DE4	Catunaregam spinosa	Rubiaceae	Catunaregam	2.3	4
DE4	Ficus hispida	Moraceae	Ficus	2.9	4
DE4	Catunaregam spinosa	Rubiaceae	Catunaregam	2.2	4
DE4	Ardisia thyrsiflora	Primulaceae	Ardisia	1.2	2.5
DE4	Litsea variabilis var. oblonga	Lauraceae	Litsea	1.4	3.5
DE4	Ficus hispida	Moraceae	Ficus	1.8	4
DE4	Ficus hispida	Moraceae	Ficus	4.9	6.5
DE4	Ficus hispida	Moraceae	Ficus	2.4	5
DE4	Catunaregam spinosa	Rubiaceae	Catunaregam	1.9	2.5
DE4	Ficus hispida	Moraceae	Ficus	4.6	6.5
DE4	Ficus hispida	Moraceae	Ficus	5.3	5.5
DE4	Antidesma bunius	Phyllanthaceae	Antidesma	2.1	2.5
DE4	Ficus hispida	Moraceae	Ficus	3.5	5
DE4	Ficus hispida	Moraceae	Ficus	1.9	4
DE4	Ficus hispida	Moraceae	Ficus	3.1	5
DE4	Radermachera frondosa	Bignoniaceae	Radermachera	3.4	4.5
DE4	Ficus hispida	Moraceae	Ficus	1.3	3
DE4	Ficus hispida	Moraceae	Ficus	1	2.5
DE4	Sterculia monosperma	Malvaceae	Sterculia	2.1	4
DE4	Ficus hispida	Moraceae	Ficus	1.2	2.5
DE4	Ficus hispida	Moraceae	Ficus	1.2	3.5
DE4	Ficus hispida	Moraceae	Ficus	1.3	3.5
DE4	Ficus hispida	Moraceae	Ficus	7.8	6.5
DE4	Ficus hispida	Moraceae	Ficus	7.7	6.5
DE4	Radermachera frondosa	Bignoniaceae	Radermachera	5.1	4.5
DE4	Ficus hispida	Moraceae	Ficus	3.2	5.5
DE4	Ficus hispida	Moraceae	Ficus	3.6	5.5
DE4	Ficus hispida	Moraceae	Ficus	3.1	5.5
DE4	Ficus hispida	Moraceae	Ficus	4.4	6.5
DE4	Ficus hispida	Moraceae	Ficus	1.8	5
DE4	Ficus hispida	Moraceae	Ficus	2.2	6
DE4	Ficus hispida	Moraceae	Ficus	3.7	6.5
DE4	Archidendron eberhardtii	Fabaceae	Archidendron	17.1	9
DE4	Ficus hispida	Moraceae	Ficus	8.3	6.5
DE4	Ficus hispida	Moraceae	Ficus	6.8	6.5
DE4	Ardisia thyrsiflora	Primulaceae	Ardisia	2.3	3.5
DE4	Ficus hispida	Moraceae	Ficus	3.9	3.5
DE4	Ficus hispida	Moraceae	Ficus	1.2	2
DE4	Ficus hispida	Moraceae	Ficus	2.5	3.5
DE5	Deutzianthus tonkinensis	Euphorbiaceae	Deutzianthus	10.5	6
DE5	Ardisia thyrsiflora	Primulaceae	Ardisia	2.3	4
DE5	Ficus hispida	Moraceae	Ficus	2	3.5
DE5	Ficus cyrtophylla	Moraceae	Ficus	12	7
DE5	Ardisia thyrsiflora	Primulaceae	Ardisia	2.2	4
DE5	Ardisia thyrsiflora	Primulaceae	Ardisia	2	3.5
DE5	Drypetes congestiflora	Putranjivaceae	Drypetes	2.3	3
DE5	Celtis timorensis	Cannabaceae	Celtis	2.6	4.5
DE5	Ficus hispida	Moraceae	Ficus	4.6	7
DE5	Ardisia thyrsiflora	Primulaceae	Ardisia	1.8	3.5
DE5	Ardisia thyrsiflora	Primulaceae	Ardisia	1.3	2.5
DE5	Ardisia thyrsiflora	Primulaceae	Ardisia	1.2	2.5
DE5	Ficus hispida	Moraceae	Ficus	1	2
DE5	Ardisia thyrsiflora	Primulaceae	Ardisia	1.3	2
DE5	Catunaregam spinosa	Rubiaceae	Catunaregam	1.7	4
DE5	Catunaregam spinosa	Rubiaceae	Catunaregam	3	4
DE5	Adenanthera microsperma	Fabaceae	Adenanthera	4.5	6
DE5	Glochidion ellipticum	Phyllanthaceae	Glochidion	8.8	8
DE5	Deutzianthus tonkinensis	Euphorbiaceae	Deutzianthus	2.8	4
DE5	Ficus oligodon	Moraceae	Ficus	11.1	9
DE5	Ardisia thyrsiflora	Primulaceae	Ardisia	1.6	3
DE5	Catunaregam spinosa	Rubiaceae	Catunaregam	2	4.5
DE5	Ardisia thyrsiflora	Primulaceae	Ardisia	1.5	3
DE5	Catunaregam spinosa	Rubiaceae	Catunaregam	1.5	4.5
DE5	Ardisia thyrsiflora	Primulaceae	Ardisia	1	3
DE5	Ficus hispida	Moraceae	Ficus	6.1	7
DE5	Ardisia thyrsiflora	Primulaceae	Ardisia	2.5	4
DE5	Ardisia thyrsiflora	Primulaceae	Ardisia	2.5	3.5
DE5	Drypetes congestiflora	Putranjivaceae	Drypetes	3.5	4
DE5	Ardisia thyrsiflora	Primulaceae	Ardisia	1.6	3
DE5	Ardisia thyrsiflora	Primulaceae	Ardisia	1.3	2.5
DE5	Ardisia thyrsiflora	Primulaceae	Ardisia	1.2	2.5
DE5	Ardisia thyrsiflora	Primulaceae	Ardisia	1.2	2.5
DE5	Ardisia thyrsiflora	Primulaceae	Ardisia	1.2	2
DE5	Ardisia thyrsiflora	Primulaceae	Ardisia	1.3	2
DE5	Deutzianthus tonkinensis	Euphorbiaceae	Deutzianthus	22	13
DE5	Ardisia thyrsiflora	Primulaceae	Ardisia	2.9	4
DE5	Ardisia thyrsiflora	Primulaceae	Ardisia	3.1	4.5
DE5	Ficus hispida	Moraceae	Ficus	4.3	6
DE5	Ardisia thyrsiflora	Primulaceae	Ardisia	3.8	5
DE5	Ardisia thyrsiflora	Primulaceae	Ardisia	2.2	3.5
DE5	Ardisia thyrsiflora	Primulaceae	Ardisia	2.8	5
DE5	Ardisia thyrsiflora	Primulaceae	Ardisia	2.3	4.5
DE5	Ardisia thyrsiflora	Primulaceae	Ardisia	2	3.5
DE5	Ardisia thyrsiflora	Primulaceae	Ardisia	3.3	5.5
DE5	Allophylus caudatus	Sapindaceae	Allophylus	9.2	12
DE5	Ardisia thyrsiflora	Primulaceae	Ardisia	2.7	4
DE5	Celtis timorensis	Cannabaceae	Celtis	4.8	5
DE5	Ardisia thyrsiflora	Primulaceae	Ardisia	1.4	2.5
DE5	Ardisia thyrsiflora	Primulaceae	Ardisia	1.2	2.5
DE5	Ardisia thyrsiflora	Primulaceae	Ardisia	1.7	4
DE5	Ardisia thyrsiflora	Primulaceae	Ardisia	1	2
DE5	Drypetes congestiflora	Putranjivaceae	Drypetes	1.2	3
DE5	Mallotus philippensis	Euphorbiaceae	Mallotus	1.6	2
DE5	Ardisia thyrsiflora	Primulaceae	Ardisia	2.6	4
DE5	Ardisia thyrsiflora	Primulaceae	Ardisia	3.2	4
DE5	Ardisia thyrsiflora	Primulaceae	Ardisia	2.8	5
DE5	Sterculia monosperma	Malvaceae	Sterculia	14.7	10
DE5	Ardisia thyrsiflora	Primulaceae	Ardisia	2.9	3.5
DE5	Sterculia monosperma	Malvaceae	Sterculia	4.2	5
DE5	Ardisia thyrsiflora	Primulaceae	Ardisia	2.4	3.5
DE5	Litsea variabilis var. oblonga	Lauraceae	Litsea	1.7	3
DE5	Ardisia thyrsiflora	Primulaceae	Ardisia	2.3	3.5
DE5	Ficus oligodon	Moraceae	Ficus	1.6	3.5
DE5	Ardisia thyrsiflora	Primulaceae	Ardisia	1.7	4
DE5	Ardisia thyrsiflora	Primulaceae	Ardisia	1.6	2.5
DE5	Ardisia thyrsiflora	Primulaceae	Ardisia	1.4	3
DE5	Ardisia thyrsiflora	Primulaceae	Ardisia	1.1	2
DE5	Ardisia thyrsiflora	Primulaceae	Ardisia	1.2	2.5
DE5	Ardisia thyrsiflora	Primulaceae	Ardisia	1.4	2.5
DE5	Ardisia thyrsiflora	Primulaceae	Ardisia	1.7	3.5
DE5	Ficus oligodon	Moraceae	Ficus	11.6	9
DE5	Litsea variabilis var. oblonga	Lauraceae	Litsea	2	3.5
DE5	Ardisia thyrsiflora	Primulaceae	Ardisia	2.2	4
DE5	Deutzianthus tonkinensis	Euphorbiaceae	Deutzianthus	16.4	12
DE5	Aphanamixis polystachya	Meliaceae	Aphanamixis	16.7	12
DE5	Litsea variabilis var. oblonga	Lauraceae	Litsea	2.5	4
DE5	Ardisia thyrsiflora	Primulaceae	Ardisia	1.9	3
DE5	Ficus hispida	Moraceae	Ficus	3.2	6
DE5	Ardisia thyrsiflora	Primulaceae	Ardisia	1.6	2.5
DE5	Ardisia thyrsiflora	Primulaceae	Ardisia	1.4	3
DE5	Ardisia thyrsiflora	Primulaceae	Ardisia	2.2	3.5
DE5	Ardisia thyrsiflora	Primulaceae	Ardisia	1.2	2
DE5	Ardisia thyrsiflora	Primulaceae	Ardisia	1.6	3
DE5	Clerodendrum wallichii	Lamiaceae	Clerodendrum	2.5	3.5
DE5	Litsea variabilis var. oblonga	Lauraceae	Litsea	2.5	3.5
DE5	Ardisia thyrsiflora	Primulaceae	Ardisia	2.2	3
DE5	Ardisia thyrsiflora	Primulaceae	Ardisia	1.5	3
DE5	Litsea variabilis var. oblonga	Lauraceae	Litsea	1.6	3.5
DE5	Ardisia thyrsiflora	Primulaceae	Ardisia	1.6	3.5
DE5	Ardisia thyrsiflora	Primulaceae	Ardisia	1.6	3.5
DE5	Dracontomelon duperreanum	Anacardiaceae	Dracontomelon	1.4	2.5
DE5	Ardisia thyrsiflora	Primulaceae	Ardisia	2	1
DE5	Ardisia thyrsiflora	Primulaceae	Ardisia	1.1	2
DE5	Vitex kwangsiensis	Lamiaceae	Vitex	7.8	6
DE5	Dracontomelon duperreanum	Anacardiaceae	Dracontomelon	2.2	4
DE5	Deutzianthus tonkinensis	Euphorbiaceae	Deutzianthus	18.7	9
DE5	Ardisia thyrsiflora	Primulaceae	Ardisia	1.7	3
DE5	Ardisia thyrsiflora	Primulaceae	Ardisia	1.3	2.5
DE5	Ardisia thyrsiflora	Primulaceae	Ardisia	1	2
DE5	Ardisia thyrsiflora	Primulaceae	Ardisia	1.1	2
DE5	Ardisia thyrsiflora	Primulaceae	Ardisia	1.2	2
DE5	Archidendron turgidum	Fabaceae	Archidendron	9.5	9
DE5	Litsea variabilis var. oblonga	Lauraceae	Litsea	2.3	3.5
DE5	Sterculia monosperma	Malvaceae	Sterculia	9.6	9
DE5	Ardisia thyrsiflora	Primulaceae	Ardisia	1.2	2.5
DE5	Ficus hispida	Moraceae	Ficus	1.8	3.5
DE5	Ardisia thyrsiflora	Primulaceae	Ardisia	2.4	3.5
DE5	Ardisia thyrsiflora	Primulaceae	Ardisia	2	3.5
DE5	Ardisia thyrsiflora	Primulaceae	Ardisia	1.7	3
DE5	Ardisia thyrsiflora	Primulaceae	Ardisia	2	3
DE5	Ardisia thyrsiflora	Primulaceae	Ardisia	1.9	3
DE5	Ficus hispida	Moraceae	Ficus	2.5	4
DE5	Ardisia thyrsiflora	Primulaceae	Ardisia	1.5	3
DE5	Ficus hispida	Moraceae	Ficus	1.2	2
DE5	Ardisia thyrsiflora	Primulaceae	Ardisia	1.7	3
DE5	Ardisia thyrsiflora	Primulaceae	Ardisia	1.5	3
DE5	Litsea variabilis var. oblonga	Lauraceae	Litsea	1	2
DE5	Vitex kwangsiensis	Lamiaceae	Vitex	1.8	3
DE5	Ficus hispida	Moraceae	Ficus	1.8	3
DE5	Ardisia thyrsiflora	Primulaceae	Ardisia	1.6	3
DE5	Ardisia thyrsiflora	Primulaceae	Ardisia	2.5	3
DE5	Ficus hispida	Moraceae	Ficus	1.2	2
DE5	Ardisia thyrsiflora	Primulaceae	Ardisia	1.3	2
DE5	Ardisia thyrsiflora	Primulaceae	Ardisia	1	2
DE5	Ficus hispida	Moraceae	Ficus	1.3	2.5
DE5	Ardisia thyrsiflora	Primulaceae	Ardisia	1.2	2
DE5	Microcos paniculata	Malvaceae	Microcos	25.4	13
DE5	Vitex kwangsiensis	Lamiaceae	Vitex	17.4	9
DE5	Dracontomelon duperreanum	Anacardiaceae	Dracontomelon	2.4	3.5
DE5	Litsea variabilis var. oblonga	Lauraceae	Litsea	1.6	2.5
DE5	Ardisia thyrsiflora	Primulaceae	Ardisia	1.6	3
DE5	Ardisia thyrsiflora	Primulaceae	Ardisia	1.7	3
DE5	Ficus hispida	Moraceae	Ficus	1.3	2
DE5	Ardisia thyrsiflora	Primulaceae	Ardisia	1.1	2
DE5	Ardisia thyrsiflora	Primulaceae	Ardisia	1.4	2
DE5	Ardisia thyrsiflora	Primulaceae	Ardisia	1.2	2
DE5	Ardisia thyrsiflora	Primulaceae	Ardisia	1.2	2.5
DE5	Ardisia thyrsiflora	Primulaceae	Ardisia	1	2
DE5	Ardisia thyrsiflora	Primulaceae	Ardisia	1	2
DE5	Ardisia thyrsiflora	Primulaceae	Ardisia	1	2
DE5	Ardisia thyrsiflora	Primulaceae	Ardisia	2.1	3
DE5	Ficus hispida	Moraceae	Ficus	2	2
DE5	Sterculia monosperma	Malvaceae	Sterculia	17.4	11
DE5	Ficus hispida	Moraceae	Ficus	3.7	5.5
DE5	Ardisia thyrsiflora	Primulaceae	Ardisia	2.2	3.5
DE5	Ardisia thyrsiflora	Primulaceae	Ardisia	1.8	3
DE5	Ardisia thyrsiflora	Primulaceae	Ardisia	1.7	3
DE5	Ficus hispida	Moraceae	Ficus	3	3.5
DE5	Deutzianthus tonkinensis	Euphorbiaceae	Deutzianthus	13.1	12
DE5	Litsea variabilis var. oblonga	Lauraceae	Litsea	2	3.5
DE5	Ardisia thyrsiflora	Primulaceae	Ardisia	2	3
DE5	Ardisia thyrsiflora	Primulaceae	Ardisia	1.3	2.5
DE5	Ardisia thyrsiflora	Primulaceae	Ardisia	1.4	3.5
DE5	Ardisia thyrsiflora	Primulaceae	Ardisia	1.8	3
DE5	Ficus hispida	Moraceae	Ficus	1.4	3.5
DE5	Ardisia thyrsiflora	Primulaceae	Ardisia	1.3	3
DE5	Litsea variabilis var. oblonga	Lauraceae	Litsea	1.2	2.5
DE5	Ardisia thyrsiflora	Primulaceae	Ardisia	1.4	3
DE5	Sterculia monosperma	Malvaceae	Sterculia	10.5	12
DE5	Ardisia thyrsiflora	Primulaceae	Ardisia	1.8	3
DE5	Ardisia thyrsiflora	Primulaceae	Ardisia	1.8	3.5
DE5	Ardisia thyrsiflora	Primulaceae	Ardisia	1.7	3
DE5	Ardisia thyrsiflora	Primulaceae	Ardisia	1.3	2
DE5	Ardisia thyrsiflora	Primulaceae	Ardisia	1.5	2.5
DE5	Ficus hispida	Moraceae	Ficus	1.6	4
DE5	Ficus hispida	Moraceae	Ficus	1.6	4
DE5	Alphonsea monogyna	Annonaceae	Alphonsea	1.6	3.5
DE5	Archidendron eberhardtii	Fabaceae	Archidendron	20.1	13
DE5	Alphonsea monogyna	Annonaceae	Alphonsea	10.8	10
DE5	Ardisia thyrsiflora	Primulaceae	Ardisia	1.5	3
DE5	Ardisia thyrsiflora	Primulaceae	Ardisia	2	2.5
DE5	Ardisia thyrsiflora	Primulaceae	Ardisia	2	3.5
DE5	Ardisia thyrsiflora	Primulaceae	Ardisia	1.6	2.5
DE5	Ardisia thyrsiflora	Primulaceae	Ardisia	1.6	3
DE5	Ardisia thyrsiflora	Primulaceae	Ardisia	1.2	3
DE5	Ardisia thyrsiflora	Primulaceae	Ardisia	2.6	4
DE5	Deutzianthus tonkinensis	Euphorbiaceae	Deutzianthus	17	10
DE5	Ardisia thyrsiflora	Primulaceae	Ardisia	2.1	3.5
DE5	Ardisia thyrsiflora	Primulaceae	Ardisia	2	3.5
DE5	Ficus oligodon	Moraceae	Ficus	11.8	12
DE5	Ardisia thyrsiflora	Primulaceae	Ardisia	1.7	3
DE5	Deutzianthus tonkinensis	Euphorbiaceae	Deutzianthus	9	9
DE5	Litsea variabilis var. oblonga	Lauraceae	Litsea	2	4
DE5	Ardisia thyrsiflora	Primulaceae	Ardisia	2.2	3
DE5	Ardisia thyrsiflora	Primulaceae	Ardisia	2.1	3
DE5	Litsea variabilis var. oblonga	Lauraceae	Litsea	1.2	2.5
DE5	Ardisia thyrsiflora	Primulaceae	Ardisia	1.1	3.5
DE5	Ardisia thyrsiflora	Primulaceae	Ardisia	1.3	2.5
DE5	Ardisia thyrsiflora	Primulaceae	Ardisia	1.2	2.5
DE5	Ardisia thyrsiflora	Primulaceae	Ardisia	1.2	2
DE5	Ardisia thyrsiflora	Primulaceae	Ardisia	1.7	3.5
DE5	Ardisia thyrsiflora	Primulaceae	Ardisia	1	2.5
DE5	Litsea variabilis var. oblonga	Lauraceae	Litsea	1.9	3
DE5	Ficus hispida	Moraceae	Ficus	1.8	4
DE5	Ficus hispida	Moraceae	Ficus	4.6	7.5
DE5	Wendlandia uvariifolia	Rubiaceae	Wendlandia	16.6	12
DE5	Deutzianthus tonkinensis	Euphorbiaceae	Deutzianthus	1.3	2.5
DE5	Ficus hispida	Moraceae	Ficus	1.9	3.5
DE5	Ardisia thyrsiflora	Primulaceae	Ardisia	1.7	2.5
DE5	Ardisia thyrsiflora	Primulaceae	Ardisia	2.6	3.5
DE5	Catunaregam spinosa	Rubiaceae	Catunaregam	1.6	5
DE5	Litsea variabilis var. oblonga	Lauraceae	Litsea	1.2	2.5
DE5	Ficus hispida	Moraceae	Ficus	1.4	2.5
DE6	Walsura robusta	Meliaceae	Walsura	7.9	7.9
DE6	Cleidion bracteosum	Euphorbiaceae	Cleidion	3	4.1
DE6	Walsura robusta	Meliaceae	Walsura	1.5	2.1
DE6	Cephalomappa sinensis	Euphorbiaceae	Cephalomappa	2.6	3.3
DE6	Diospyros siderophylla	Ebenaceae	Diospyros	6.3	8.3
DE6	Walsura robusta	Meliaceae	Walsura	11.2	7.6
DE6	Amesiodendron chinense	Sapindaceae	Amesiodendron	4.7	6.9
DE6	Cleidion bracteosum	Euphorbiaceae	Cleidion	11.9	8.3
DE6	Walsura robusta	Meliaceae	Walsura	1.4	2.1
DE6	Walsura robusta	Meliaceae	Walsura	3.9	6.8
DE6	Walsura robusta	Meliaceae	Walsura	4.3	6.9
DE6	Cleidion bracteosum	Euphorbiaceae	Cleidion	1.8	3.5
DE6	Cephalomappa sinensis	Euphorbiaceae	Cephalomappa	6.9	9.5
DE6	Cleidion bracteosum	Euphorbiaceae	Cleidion	8.4	6.9
DE6	Cleidion bracteosum	Euphorbiaceae	Cleidion	8.3	7.3
DE6	Cleidion bracteosum	Euphorbiaceae	Cleidion	4	3.9
DE6	Cleidion bracteosum	Euphorbiaceae	Cleidion	5.7	8.5
DE6	Streblus tonkinensis	Moraceae	Streblus	23.5	18
DE6	Diplodiscus trichospermus	Malvaceae	Diplodiscus	30	12.3
DE6	Cleidion bracteosum	Euphorbiaceae	Cleidion	4.3	6.9
DE6	Cleidion bracteosum	Euphorbiaceae	Cleidion	5.8	5.9
DE6	Cleidion bracteosum	Euphorbiaceae	Cleidion	6.3	8.9
DE6	Cleidion bracteosum	Euphorbiaceae	Cleidion	13.9	8.5
DE6	Urceola rosea	Apocynaceae	Urceola	6.7	17
DE6	Cleidion bracteosum	Euphorbiaceae	Cleidion	10.5	5.9
DE6	Cleidion bracteosum	Euphorbiaceae	Cleidion	9.5	6.2
DE6	Cleidion bracteosum	Euphorbiaceae	Cleidion	9.2	5.9
DE6	Cleidion bracteosum	Euphorbiaceae	Cleidion	3.8	4.9
DE6	Cleidion bracteosum	Euphorbiaceae	Cleidion	7.6	4.7
DE6	Sterculia lanceolata	Malvaceae	Sterculia	3.3	10.5
DE6	Cleidion bracteosum	Euphorbiaceae	Cleidion	6.1	3.9
DE6	Fordia cauliflora	Fabaceae	Fordia	1.5	3.3
DE6	Cleidion bracteosum	Euphorbiaceae	Cleidion	2.3	3.1
DE6	Urceola rosea	Apocynaceae	Urceola	3.3	18
DE6	Sterculia monosperma	Malvaceae	Sterculia	15.1	4.7
DE6	Urceola rosea	Apocynaceae	Urceola	3.4	17
DE6	Cleidion bracteosum	Euphorbiaceae	Cleidion	4.9	6.9
DE6	Cleidion bracteosum	Euphorbiaceae	Cleidion	4.1	4.9
DE6	Cleidion bracteosum	Euphorbiaceae	Cleidion	1	1.9
DE6	Cleidion bracteosum	Euphorbiaceae	Cleidion	14.2	6.3
DE6	Sterculia lanceolata	Malvaceae	Sterculia	2.8	3.9
DE6	Cleidion bracteosum	Euphorbiaceae	Cleidion	1.2	1.5
DE6	Cleidion bracteosum	Euphorbiaceae	Cleidion	7.3	7.7
DE6	Cleidion bracteosum	Euphorbiaceae	Cleidion	4.1	5.9
DE6	Cleidion bracteosum	Euphorbiaceae	Cleidion	7.6	6.5
DE6	Cleidion bracteosum	Euphorbiaceae	Cleidion	2	3.5
DE6	Cleidion bracteosum	Euphorbiaceae	Cleidion	3.5	6.7
DE6	Cleidion bracteosum	Euphorbiaceae	Cleidion	4.7	4.9
DE6	Cleidion bracteosum	Euphorbiaceae	Cleidion	3.7	4.1
DE6	Deutzianthus tonkinensis	Euphorbiaceae	Deutzianthus	22.3	7.9
DE6	Cleidion bracteosum	Euphorbiaceae	Cleidion	16.8	17
DE6	Ardisia thyrsiflora	Primulaceae	Ardisia	1.3	2.3
DE6	Ficus hispida	Moraceae	Ficus	1.4	3.9
DE6	Cleidion bracteosum	Euphorbiaceae	Cleidion	7.3	7.5
DE6	Cleidion bracteosum	Euphorbiaceae	Cleidion	5.8	8.5
DE6	Cleidion bracteosum	Euphorbiaceae	Cleidion	14.3	7.9
DE6	Cleidion bracteosum	Euphorbiaceae	Cleidion	10	6.9
DE6	Cleidion bracteosum	Euphorbiaceae	Cleidion	6.7	4.2
DE6	Ardisia thyrsiflora	Primulaceae	Ardisia	1.5	3.9
DE6	Fordia cauliflora	Fabaceae	Fordia	4.5	6.9
DE6	Cleidion bracteosum	Euphorbiaceae	Cleidion	4.3	5.4
DE6	Cleidion bracteosum	Euphorbiaceae	Cleidion	12.4	8.5
DE6	Cleidion bracteosum	Euphorbiaceae	Cleidion	10.4	6.9
DE6	Cleidion bracteosum	Euphorbiaceae	Cleidion	8.4	5.4
DE6	Urceola rosea	Apocynaceae	Urceola	4.6	15
DE6	Cleidion bracteosum	Euphorbiaceae	Cleidion	4.7	4.7
DE6	Pterolobium punctatum	Fabaceae	Pterolobium	2.8	17
DE6	Cleidion bracteosum	Euphorbiaceae	Cleidion	1.2	1.6
DE6	Cleidion bracteosum	Euphorbiaceae	Cleidion	3.1	7.2
DE6	Urceola rosea	Apocynaceae	Urceola	5	5.4
DE6	Cleidion bracteosum	Euphorbiaceae	Cleidion	7	7.1
DE6	Cleidion bracteosum	Euphorbiaceae	Cleidion	5.5	4.9
DE6	Cleidion bracteosum	Euphorbiaceae	Cleidion	8.3	8.5
DE6	Oroxylum indicum	Bignoniaceae	Oroxylum	22.6	7.9
DE6	Ficus tinctoria subsp. gibbosa	Moraceae	Ficus	6.2	9.4
DE6	Catunaregam spinosa	Rubiaceae	Catunaregam	6.5	5.9
DE6	Cleidion bracteosum	Euphorbiaceae	Cleidion	10.1	7.9
DE6	Urceola rosea	Apocynaceae	Urceola	2.8	17
DE6	Leea indica	Vitaceae	Leea	1.5	3.9
DE6	Ardisia thyrsiflora	Primulaceae	Ardisia	1.9	4.1
DE6	Cleidion bracteosum	Euphorbiaceae	Cleidion	3.9	6.9
DE6	Cleidion bracteosum	Euphorbiaceae	Cleidion	6	5.9
DE6	Fordia cauliflora	Fabaceae	Fordia	2.9	7.1
DE6	Ardisia thyrsiflora	Primulaceae	Ardisia	1.9	1.9
DE6	Cleidion bracteosum	Euphorbiaceae	Cleidion	4.3	6.9
DE6	Canthium horridum	Rubiaceae	Canthium	2	4.1
DE6	Cleidion bracteosum	Euphorbiaceae	Cleidion	3.1	5.4
DE6	Cleidion bracteosum	Euphorbiaceae	Cleidion	1.43	1.9
DE6	Ardisia thyrsiflora	Primulaceae	Ardisia	3.1	6.9
DE6	Cleidion bracteosum	Euphorbiaceae	Cleidion	3.5	7.1
DE6	Fordia cauliflora	Fabaceae	Fordia	4.6	7.1
DE6	Cleidion bracteosum	Euphorbiaceae	Cleidion	4.9	7.5
DE6	Cleidion bracteosum	Euphorbiaceae	Cleidion	1.3	2.6
DE6	Cleidion bracteosum	Euphorbiaceae	Cleidion	2.8	3.9
DE6	Ardisia thyrsiflora	Primulaceae	Ardisia	1.6	3.9
DE6	Vitex kwangsiensis	Lamiaceae	Vitex	13.7	15
DE6	Cleidion bracteosum	Euphorbiaceae	Cleidion	2.7	3.9
DE6	Cleidion bracteosum	Euphorbiaceae	Cleidion	8.3	8.3
DE6	Cleidion bracteosum	Euphorbiaceae	Cleidion	1.3	2.6
DE6	Cleidion bracteosum	Euphorbiaceae	Cleidion	9.4	7.9
DE6	Urceola rosea	Apocynaceae	Urceola	4.2	20
DE6	Cleidion bracteosum	Euphorbiaceae	Cleidion	9.8	8.9
DE6	Cleidion bracteosum	Euphorbiaceae	Cleidion	4.5	4.2
DE6	Cleidion bracteosum	Euphorbiaceae	Cleidion	5.6	4.1
DE6	Cleidion bracteosum	Euphorbiaceae	Cleidion	7.3	10.5
DE6	Cleidion bracteosum	Euphorbiaceae	Cleidion	2.6	2.1
DE6	Cleidion bracteosum	Euphorbiaceae	Cleidion	7.8	5.9
DE6	Cleidion bracteosum	Euphorbiaceae	Cleidion	1.4	1.9
DE6	Cleidion bracteosum	Euphorbiaceae	Cleidion	4.6	3.9
DE6	Cleidion bracteosum	Euphorbiaceae	Cleidion	1.2	2.1
DE6	Oroxylum indicum	Bignoniaceae	Oroxylum	2.8	20.5
DE6	Urceola rosea	Apocynaceae	Urceola	5.9	22
DE6	Deutzianthus tonkinensis	Euphorbiaceae	Deutzianthus	31.2	18
DE6	Cleidion bracteosum	Euphorbiaceae	Cleidion	3.8	7.5
DE6	Cleidion bracteosum	Euphorbiaceae	Cleidion	1.6	2.6
DE6	Urceola rosea	Apocynaceae	Urceola	4	19
DE6	Cleidion bracteosum	Euphorbiaceae	Cleidion	9.1	6.9
DE6	Canthium horridum	Rubiaceae	Canthium	4	3.9
DE6	Ardisia thyrsiflora	Primulaceae	Ardisia	2.9	4.3
DE6	Cleidion bracteosum	Euphorbiaceae	Cleidion	1.6	2.7
DE6	Clerodendrum wallichii	Lamiaceae	Clerodendrum	2.9	1.9
DE6	Cleidion bracteosum	Euphorbiaceae	Cleidion	2.1	4.9
DE6	Cleidion bracteosum	Euphorbiaceae	Cleidion	1	2.3
DE6	Deutzianthus tonkinensis	Euphorbiaceae	Deutzianthus	19.8	17.9
DE6	Cleidion bracteosum	Euphorbiaceae	Cleidion	1.4	4.9
DE6	Cleidion bracteosum	Euphorbiaceae	Cleidion	2.8	5.4
DE6	Sterculia monosperma	Malvaceae	Sterculia	1.9	5.9
DE6	Cleidion bracteosum	Euphorbiaceae	Cleidion	4.5	6.1
DE6	Cleidion bracteosum	Euphorbiaceae	Cleidion	2.1	4.1
DE7	Ardisia thyrsiflora	Primulaceae	Ardisia	2.1	3.1
DE7	Ardisia thyrsiflora	Primulaceae	Ardisia	1.7	2.6
DE7	Ardisia thyrsiflora	Primulaceae	Ardisia	1	1.8
DE7	Ardisia thyrsiflora	Primulaceae	Ardisia	2	3
DE7	Ardisia thyrsiflora	Primulaceae	Ardisia	1.8	2.2
DE7	Ardisia thyrsiflora	Primulaceae	Ardisia	1.5	2.4
DE7	Ardisia thyrsiflora	Primulaceae	Ardisia	1.9	2
DE7	Ardisia thyrsiflora	Primulaceae	Ardisia	2.2	3
DE7	Ardisia thyrsiflora	Primulaceae	Ardisia	1.4	2.8
DE7	Ardisia thyrsiflora	Primulaceae	Ardisia	3	3.7
DE7	Ardisia thyrsiflora	Primulaceae	Ardisia	1.9	3
DE7	Ardisia thyrsiflora	Primulaceae	Ardisia	1.2	1.9
DE7	Ardisia thyrsiflora	Primulaceae	Ardisia	2.2	3.1
DE7	Ardisia thyrsiflora	Primulaceae	Ardisia	1.1	2
DE7	Ardisia thyrsiflora	Primulaceae	Ardisia	1.6	1.5
DE7	Ardisia thyrsiflora	Primulaceae	Ardisia	1.4	1.6
DE7	Ardisia thyrsiflora	Primulaceae	Ardisia	1.5	2.8
DE7	Ardisia thyrsiflora	Primulaceae	Ardisia	2.2	2.1
DE7	Celtis timorensis	Cannabaceae	Celtis	5.5	6.5
DE7	Sterculia monosperma	Malvaceae	Sterculia	15.7	6.8
DE7	Ardisia thyrsiflora	Primulaceae	Ardisia	2.5	3.2
DE7	Canthium horridum	Rubiaceae	Canthium	1.2	2.1
DE7	Ardisia thyrsiflora	Primulaceae	Ardisia	2.3	3.3
DE7	Ardisia thyrsiflora	Primulaceae	Ardisia	2.2	3.5
DE7	Ardisia thyrsiflora	Primulaceae	Ardisia	1.1	2
DE7	Ardisia thyrsiflora	Primulaceae	Ardisia	1.4	2
DE7	Pterolobium punctatum	Fabaceae	Pterolobium	2.6	16M
DE7	Ardisia thyrsiflora	Primulaceae	Ardisia	1.9	2
DE7	Ardisia thyrsiflora	Primulaceae	Ardisia	1.2	1.9
DE7	Ardisia thyrsiflora	Primulaceae	Ardisia	3.7	2.8
DE7	Ardisia thyrsiflora	Primulaceae	Ardisia	1.8	2.1
DE7	Ardisia thyrsiflora	Primulaceae	Ardisia	1.9	2.1
DE7	Ardisia thyrsiflora	Primulaceae	Ardisia	1.8	1.9
DE7	Deutzianthus tonkinensis	Euphorbiaceae	Deutzianthus	28.3	11.5
DE7	Ardisia thyrsiflora	Primulaceae	Ardisia	1.5	3
DE7	Ardisia thyrsiflora	Primulaceae	Ardisia	1.1	3
DE7	Ardisia thyrsiflora	Primulaceae	Ardisia	1.2	2.2
DE7	Ardisia thyrsiflora	Primulaceae	Ardisia	2.1	2.8
DE7	Ardisia thyrsiflora	Primulaceae	Ardisia	3.1	2.8
DE7	Ardisia thyrsiflora	Primulaceae	Ardisia	1.4	2
DE7	Ardisia thyrsiflora	Primulaceae	Ardisia	1.3	2.2
DE7	Ardisia thyrsiflora	Primulaceae	Ardisia	2.4	2.1
DE7	Ardisia thyrsiflora	Primulaceae	Ardisia	1.2	1.6
DE7	Ardisia thyrsiflora	Primulaceae	Ardisia	1.5	2.3
DE7	Ardisia thyrsiflora	Primulaceae	Ardisia	3.1	2.2
DE7	Oroxylum indicum	Bignoniaceae	Oroxylum	13.3	8.5
DE7	Ardisia thyrsiflora	Primulaceae	Ardisia	2	3.2
DE7	Ardisia thyrsiflora	Primulaceae	Ardisia	1	1.9
DE7	Ardisia thyrsiflora	Primulaceae	Ardisia	2.2	3.6
DE7	Ardisia thyrsiflora	Primulaceae	Ardisia	1.2	2.3
DE7	Ardisia thyrsiflora	Primulaceae	Ardisia	1.6	2
DE7	Ardisia thyrsiflora	Primulaceae	Ardisia	2.1	1.8
DE7	Ardisia thyrsiflora	Primulaceae	Ardisia	1.6	2.3
DE7	Ardisia thyrsiflora	Primulaceae	Ardisia	2	2
DE7	Pterolobium punctatum	Fabaceae	Pterolobium	5.1	20M
DE7	Radermachera frondosa	Bignoniaceae	Radermachera	1.2	2.5
DE7	Ardisia thyrsiflora	Primulaceae	Ardisia	1.9	3
DE7	Ardisia thyrsiflora	Primulaceae	Ardisia	1.9	3
DE7	Ardisia thyrsiflora	Primulaceae	Ardisia	2	3
DE7	Ardisia thyrsiflora	Primulaceae	Ardisia	2.5	3.5
DE7	Ardisia thyrsiflora	Primulaceae	Ardisia	1.8	2.5
DE7	Ardisia thyrsiflora	Primulaceae	Ardisia	1.7	2
DE7	Ardisia thyrsiflora	Primulaceae	Ardisia	1.8	2
DE7	Ardisia thyrsiflora	Primulaceae	Ardisia	1.6	2.4
DE7	Ardisia thyrsiflora	Primulaceae	Ardisia	1.9	1.9
DE7	Ardisia thyrsiflora	Primulaceae	Ardisia	1.7	2
DE7	Ardisia thyrsiflora	Primulaceae	Ardisia	1.7	1.6
DE7	Clerodendrum wallichii	Lamiaceae	Clerodendrum	1.2	2
DE7	Ardisia thyrsiflora	Primulaceae	Ardisia	1.3	2
DE7	Pterolobium punctatum	Fabaceae	Pterolobium	4.2	16M
DE7	Ardisia thyrsiflora	Primulaceae	Ardisia	1.9	2.2
DE7	Ardisia thyrsiflora	Primulaceae	Ardisia	1.9	2.4
DE7	Ardisia thyrsiflora	Primulaceae	Ardisia	1.9	2
DE7	Vitex kwangsiensis	Lamiaceae	Vitex	18	8
DE7	Ardisia thyrsiflora	Primulaceae	Ardisia	1.3	2.3
DE7	Sterculia monosperma	Malvaceae	Sterculia	2.1	3.3
DE7	Deutzianthus tonkinensis	Euphorbiaceae	Deutzianthus	13.5	7
DE7	Ardisia thyrsiflora	Primulaceae	Ardisia	1.4	1.9
DE7	Ardisia thyrsiflora	Primulaceae	Ardisia	2.5	2.2
DE7	Sterculia monosperma	Malvaceae	Sterculia	2.8	2.1
DE7	Lysidice rhodostegia	Fabaceae	Lysidice	12.1	11
DE7	Ardisia thyrsiflora	Primulaceae	Ardisia	3.2	3.2
DE7	Deutzianthus tonkinensis	Euphorbiaceae	Deutzianthus	22.8	11
DE7	Ficus hispida	Moraceae	Ficus	1.3	2.8
DE7	Sterculia monosperma	Malvaceae	Sterculia	3.8	4.2
DE7	Ardisia thyrsiflora	Primulaceae	Ardisia	1.8	3.4
DE7	Ardisia thyrsiflora	Primulaceae	Ardisia	2	2.2
DE7	Ficus hispida	Moraceae	Ficus	4.6	4.2
DE7	Sterculia monosperma	Malvaceae	Sterculia	3.9	4.5
DE7	Ardisia thyrsiflora	Primulaceae	Ardisia	2.3	3
DE7	Ardisia thyrsiflora	Primulaceae	Ardisia	1.6	3
DE7	Ficus hispida	Moraceae	Ficus	1.6	2.1
DE7	Ficus hispida	Moraceae	Ficus	6.2	6.5
DE7	Ardisia thyrsiflora	Primulaceae	Ardisia	2	2.5
DE7	Ardisia thyrsiflora	Primulaceae	Ardisia	2	2.8
DE7	Ardisia thyrsiflora	Primulaceae	Ardisia	1.1	2.3
DE7	Ardisia thyrsiflora	Primulaceae	Ardisia	1.3	2.8
DE7	Ardisia thyrsiflora	Primulaceae	Ardisia	3.2	3.3
DE7	Ardisia thyrsiflora	Primulaceae	Ardisia	2	2.6
DE7	Ardisia thyrsiflora	Primulaceae	Ardisia	2.9	3.5
DE7	Ardisia thyrsiflora	Primulaceae	Ardisia	1.4	1.8
DE7	Ardisia thyrsiflora	Primulaceae	Ardisia	2	1.9
DE7	Ardisia thyrsiflora	Primulaceae	Ardisia	1.9	2.3
DE7	Ardisia thyrsiflora	Primulaceae	Ardisia	2.1	2.5
DE7	Ardisia thyrsiflora	Primulaceae	Ardisia	2.5	2.6
DE7	Ardisia thyrsiflora	Primulaceae	Ardisia	1.4	2.3
DE7	Ardisia thyrsiflora	Primulaceae	Ardisia	1.2	2.1
DE7	Sterculia monosperma	Malvaceae	Sterculia	8.7	6.5
DE7	Ardisia thyrsiflora	Primulaceae	Ardisia	2.2	2.3
DE7	Ardisia thyrsiflora	Primulaceae	Ardisia	2.2	4
DE7	Ardisia thyrsiflora	Primulaceae	Ardisia	3	3.8
DE7	Deutzianthus tonkinensis	Euphorbiaceae	Deutzianthus	35.8	10.5
DE7	Ardisia thyrsiflora	Primulaceae	Ardisia	1.8	2.8
DE7	Ardisia thyrsiflora	Primulaceae	Ardisia	2	3
DE7	Ardisia thyrsiflora	Primulaceae	Ardisia	2.5	3.5
DE7	Ardisia thyrsiflora	Primulaceae	Ardisia	2	2
DE7	Dracontomelon duperreanum	Anacardiaceae	Dracontomelon	53	12
DE7	Alstonia scholaris	Apocynaceae	Alstonia	1.1	2
DE7	Ardisia thyrsiflora	Primulaceae	Ardisia	2.2	2
DE7	Ardisia thyrsiflora	Primulaceae	Ardisia	2.3	2.3
DE7	Deutzianthus tonkinensis	Euphorbiaceae	Deutzianthus	7.4	6.3
DE7	Ardisia thyrsiflora	Primulaceae	Ardisia	1.9	3.2
DE7	Syzygium chunianum	Myrtaceae	Syzygium	7.7	6.5
DE7	Ardisia thyrsiflora	Primulaceae	Ardisia	1.2	1.8
DE7	Ficus hispida	Moraceae	Ficus	1.5	2.1
DE7	Ardisia thyrsiflora	Primulaceae	Ardisia	2.3	2
DE7	Ardisia thyrsiflora	Primulaceae	Ardisia	1.2	1.8
DE7	Deutzianthus tonkinensis	Euphorbiaceae	Deutzianthus	5.4	4.6
DE7	Pterolobium punctatum	Fabaceae	Pterolobium	2.2	15M
DE7	Ardisia thyrsiflora	Primulaceae	Ardisia	2.6	2.5
DE7	Ardisia thyrsiflora	Primulaceae	Ardisia	1.4	1.7
DE7	Ardisia thyrsiflora	Primulaceae	Ardisia	1.3	2.1
DE7	Ficus hispida	Moraceae	Ficus	1.4	3.1
DE7	Glochidion coccineum	Phyllanthaceae	Glochidion	5.1	5
DE7	Ardisia thyrsiflora	Primulaceae	Ardisia	2.5	4.5
DE7	Ardisia thyrsiflora	Primulaceae	Ardisia	1.4	3.1
DE7	Ardisia thyrsiflora	Primulaceae	Ardisia	2.5	6.1
DE7	Pterolobium punctatum	Fabaceae	Pterolobium	3.3	20
DE7	Vitex kwangsiensis	Lamiaceae	Vitex	25.4	10.8
DE7	Ardisia thyrsiflora	Primulaceae	Ardisia	2	3.5
DE7	Flueggea virosa	Phyllanthaceae	Flueggea	19.8	13
DE7	Ficus hispida	Moraceae	Ficus	3.1	3.9
DE7	Ardisia thyrsiflora	Primulaceae	Ardisia	2.1	3.3
DE7	Ardisia thyrsiflora	Primulaceae	Ardisia	2.7	3.3
DE7	Ficus hispida	Moraceae	Ficus	2.8	3.9
DE7	Ardisia thyrsiflora	Primulaceae	Ardisia	2.5	3.8
DE7	Ardisia thyrsiflora	Primulaceae	Ardisia	1.8	2.9
DE7	Vitex kwangsiensis	Lamiaceae	Vitex	15.8	13.3
DE7	Vitex kwangsiensis	Lamiaceae	Vitex	13.7	10.5
DE7	Ardisia thyrsiflora	Primulaceae	Ardisia	1.2	2.9
DE7	Ardisia thyrsiflora	Primulaceae	Ardisia	2.2	3.5
DE7	Ardisia thyrsiflora	Primulaceae	Ardisia	3.5	2.9
DE7	Ardisia thyrsiflora	Primulaceae	Ardisia	1.7	2.5
DE7	Ardisia thyrsiflora	Primulaceae	Ardisia	2	2.7
DE7	Deutzianthus tonkinensis	Euphorbiaceae	Deutzianthus	14.8	15.2
DE7	Sterculia monosperma	Malvaceae	Sterculia	1.6	2.3
DE7	Ardisia thyrsiflora	Primulaceae	Ardisia	2.4	3.3
DE7	Flueggea virosa	Phyllanthaceae	Flueggea	21.2	14.5
DE7	Ardisia thyrsiflora	Primulaceae	Ardisia	2.8	3.1
DE7	Ardisia thyrsiflora	Primulaceae	Ardisia	2	2.1
DE7	Ardisia thyrsiflora	Primulaceae	Ardisia	1.4	3.1
DE7	Ardisia thyrsiflora	Primulaceae	Ardisia	2.2	2.9
DE7	Ficus hispida	Moraceae	Ficus	3.1	3.5
DE7	Ardisia thyrsiflora	Primulaceae	Ardisia	1.4	1.9
DE7	Ficus hispida	Moraceae	Ficus	2.3	4.1
DE7	Ardisia thyrsiflora	Primulaceae	Ardisia	2.1	4.1
DE7	Ficus hispida	Moraceae	Ficus	2.7	4.5
DE7	Ardisia thyrsiflora	Primulaceae	Ardisia	1.4	2.3
DE7	Ardisia thyrsiflora	Primulaceae	Ardisia	2.1	3.3
DE7	Ardisia thyrsiflora	Primulaceae	Ardisia	2.2	4.7
DE7	Ficus hispida	Moraceae	Ficus	2.8	6.1
DE7	Ardisia thyrsiflora	Primulaceae	Ardisia	2	3.3
DE7	Ardisia thyrsiflora	Primulaceae	Ardisia	1.4	2.9
DE7	Ardisia thyrsiflora	Primulaceae	Ardisia	2.3	4.1
DE7	Ardisia thyrsiflora	Primulaceae	Ardisia	2.8	4.7
DE7	Ficus hispida	Moraceae	Ficus	2	3.5
DE7	Ficus hispida	Moraceae	Ficus	3.1	4.7
DE7	Ardisia thyrsiflora	Primulaceae	Ardisia	2.2	3.3
DE7	Ardisia thyrsiflora	Primulaceae	Ardisia	1.7	3.1
DE7	Ardisia thyrsiflora	Primulaceae	Ardisia	2	3.9
DE7	Ardisia thyrsiflora	Primulaceae	Ardisia	2.5	4.2
DE7	Wendlandia uvariifolia	Rubiaceae	Wendlandia	16	15
DE7	Ardisia thyrsiflora	Primulaceae	Ardisia	2	3.3
DE7	Ardisia thyrsiflora	Primulaceae	Ardisia	2	2.3
DE7	Ardisia thyrsiflora	Primulaceae	Ardisia	1.4	1.9
DE7	Ficus hispida	Moraceae	Ficus	2.1	3.5
DE7	Ardisia thyrsiflora	Primulaceae	Ardisia	1.3	2.9
DE7	Ardisia thyrsiflora	Primulaceae	Ardisia	1.4	2.3
DE7	Ardisia thyrsiflora	Primulaceae	Ardisia	1.4	2.4
DE7	Ardisia thyrsiflora	Primulaceae	Ardisia	2.8	3.9
DE7	Ardisia thyrsiflora	Primulaceae	Ardisia	1.5	4.2
DE7	Ardisia thyrsiflora	Primulaceae	Ardisia	1.9	4.1
DE7	Ficus hispida	Moraceae	Ficus	2.7	4.3
DE7	Leea indica	Vitaceae	Leea	1.5	4.5
DE7	Ardisia thyrsiflora	Primulaceae	Ardisia	2.2	4.1
DE7	Sterculia monosperma	Malvaceae	Sterculia	16.8	16.5
DE7	Celtis timorensis	Cannabaceae	Celtis	3.3	3.9
DE7	Ardisia thyrsiflora	Primulaceae	Ardisia	2.8	4.2
DE7	Ardisia thyrsiflora	Primulaceae	Ardisia	2.5	4.5
DE7	Ficus hispida	Moraceae	Ficus	1.9	3.9
DE7	Ficus hispida	Moraceae	Ficus	2	4.1
DE7	Ficus hispida	Moraceae	Ficus	2.1	4.5
DE7	Ardisia thyrsiflora	Primulaceae	Ardisia	1.9	3.9
DE7	Ardisia thyrsiflora	Primulaceae	Ardisia	1.8	2.5
DE7	Ardisia thyrsiflora	Primulaceae	Ardisia	1.6	2.9
DE7	Ardisia thyrsiflora	Primulaceae	Ardisia	2	3.9
DE7	Ardisia thyrsiflora	Primulaceae	Ardisia	2.1	3.3
DE7	Ardisia thyrsiflora	Primulaceae	Ardisia	2.6	3.9
DE7	Ardisia thyrsiflora	Primulaceae	Ardisia	2.4	3.3
DE7	Ardisia thyrsiflora	Primulaceae	Ardisia	3.1	4.5
DE7	Ardisia thyrsiflora	Primulaceae	Ardisia	1.2	1.9
DE7	Ardisia thyrsiflora	Primulaceae	Ardisia	1.5	2.3
DE7	Ardisia thyrsiflora	Primulaceae	Ardisia	1.1	2.1
DE7	Wendlandia uvariifolia	Rubiaceae	Wendlandia	19.3	17
DE7	Ardisia thyrsiflora	Primulaceae	Ardisia	1.7	2.5
DE7	Ardisia thyrsiflora	Primulaceae	Ardisia	2.2	3.1
DE7	Ardisia thyrsiflora	Primulaceae	Ardisia	2.3	3.3
DE7	Ardisia thyrsiflora	Primulaceae	Ardisia	1.7	2.9
DE7	Ardisia thyrsiflora	Primulaceae	Ardisia	1.2	3.1
DE7	Ardisia thyrsiflora	Primulaceae	Ardisia	2.1	3.5
DE7	Ardisia thyrsiflora	Primulaceae	Ardisia	2.1	2.9
DE7	Tetrastigma planicaule	Vitaceae	Tetrastigma	9.2	17
DE7	Ardisia thyrsiflora	Primulaceae	Ardisia	1.6	3.5
DE7	Ardisia thyrsiflora	Primulaceae	Ardisia	2.2	3.9
DE7	Ardisia thyrsiflora	Primulaceae	Ardisia	1.9	3.7
DE7	Wendlandia uvariifolia	Rubiaceae	Wendlandia	18	17.9
DE7	Pterolobium punctatum	Fabaceae	Pterolobium	2.4	18
DE7	Ardisia thyrsiflora	Primulaceae	Ardisia	1.9	3.1
DE7	Ardisia thyrsiflora	Primulaceae	Ardisia	2.6	4.2
DE7	Glochidion coccineum	Phyllanthaceae	Glochidion	2.3	3.5
DE7	Ardisia thyrsiflora	Primulaceae	Ardisia	1.3	2.1
DE7	Ardisia thyrsiflora	Primulaceae	Ardisia	2.2	3.9
DE7	Ficus hispida	Moraceae	Ficus	2.5	4.2
DE7	Ficus hispida	Moraceae	Ficus	2.5	3.3
DE7	Ardisia thyrsiflora	Primulaceae	Ardisia	1.5	3.3
DE7	Ardisia thyrsiflora	Primulaceae	Ardisia	1.6	4.1
DE7	Ardisia thyrsiflora	Primulaceae	Ardisia	2	4.5
DE7	Ardisia thyrsiflora	Primulaceae	Ardisia	1.9	3.1
DE7	Wendlandia uvariifolia	Rubiaceae	Wendlandia	18.2	10.5
DE7	Ardisia thyrsiflora	Primulaceae	Ardisia	1.6	3.9
DE7	Ardisia thyrsiflora	Primulaceae	Ardisia	2.9	4.2
DE7	Ardisia thyrsiflora	Primulaceae	Ardisia	2	4.1
DE7	Ardisia thyrsiflora	Primulaceae	Ardisia	1.3	2.9
DE7	Ardisia thyrsiflora	Primulaceae	Ardisia	1.5	2.9
DE7	Ardisia thyrsiflora	Primulaceae	Ardisia	1.3	2.3
DE7	Glochidion coccineum	Phyllanthaceae	Glochidion	2	4.5
DE7	Ardisia thyrsiflora	Primulaceae	Ardisia	1.4	2.3
DE7	Ardisia thyrsiflora	Primulaceae	Ardisia	1.7	3.9
DE7	Ardisia thyrsiflora	Primulaceae	Ardisia	1.9	2.9
DE7	Ficus hispida	Moraceae	Ficus	1.5	4.1
DE7	Ardisia thyrsiflora	Primulaceae	Ardisia	1.3	2.5
DE7	Ardisia thyrsiflora	Primulaceae	Ardisia	1.3	2.1
DE7	Ficus hispida	Moraceae	Ficus	1.5	4.1
DE7	Ardisia thyrsiflora	Primulaceae	Ardisia	1.3	2.1
DE7	Sterculia monosperma	Malvaceae	Sterculia	4.7	5.4
DE7	Ardisia thyrsiflora	Primulaceae	Ardisia	1.9	2.3
DE7	Ardisia thyrsiflora	Primulaceae	Ardisia	2.3	3.9
DE7	Ardisia thyrsiflora	Primulaceae	Ardisia	1.3	2.5
DE7	Ardisia thyrsiflora	Primulaceae	Ardisia	1.3	2.9
DE7	Ardisia thyrsiflora	Primulaceae	Ardisia	1.2	1.9
DE7	Ardisia thyrsiflora	Primulaceae	Ardisia	1.4	1.7
DE7	Ficus hispida	Moraceae	Ficus	1.8	4.2
DE7	Ardisia thyrsiflora	Primulaceae	Ardisia	1.6	2.1
DE7	Ardisia thyrsiflora	Primulaceae	Ardisia	2.5	4.5
DE7	Ardisia thyrsiflora	Primulaceae	Ardisia	2.1	3.1
DE7	Mallotus philippensis	Euphorbiaceae	Mallotus	2.1	1.9
DE7	Ardisia thyrsiflora	Primulaceae	Ardisia	1.5	4.7
DE7	Ardisia thyrsiflora	Primulaceae	Ardisia	1.6	2.8
DE7	Ardisia thyrsiflora	Primulaceae	Ardisia	1.6	2.9
DE7	Ardisia thyrsiflora	Primulaceae	Ardisia	1.8	2.9
DE7	Ficus hispida	Moraceae	Ficus	2	3.3
DE7	Ardisia thyrsiflora	Primulaceae	Ardisia	1.3	1.9
DE7	Ficus hispida	Moraceae	Ficus	2.2	4.3
DE7	Ardisia thyrsiflora	Primulaceae	Ardisia	1.6	3.9
DE7	Ardisia thyrsiflora	Primulaceae	Ardisia	1.4	2.9
DE7	Ardisia thyrsiflora	Primulaceae	Ardisia	2.3	4.1
DE7	Ficus hispida	Moraceae	Ficus	2.4	5.1
DE7	Ardisia thyrsiflora	Primulaceae	Ardisia	2.2	5
DE7	Ardisia thyrsiflora	Primulaceae	Ardisia	2.3	5.3
DE7	Ardisia thyrsiflora	Primulaceae	Ardisia	2.1	5.4
DE7	Sterculia monosperma	Malvaceae	Sterculia	2.4	5.5
DE7	Ardisia thyrsiflora	Primulaceae	Ardisia	1	1.9
DE8	Cleistanthus petelotii	Phyllanthaceae	Cleistanthus	7.6	5.1
DE8	Cephalomappa sinensis	Euphorbiaceae	Cephalomappa	20.5	8.2
DE8	Cleistanthus petelotii	Phyllanthaceae	Cleistanthus	21.4	8.4
DE8	Jatropha curcas	Euphorbiaceae	Jatropha	25	7.5
DE8	Cleidion bracteosum	Euphorbiaceae	Cleidion	10.4	6.9
DE8	Cleidion bracteosum	Euphorbiaceae	Cleidion	6.1	4.9
DE8	Cleidion bracteosum	Euphorbiaceae	Cleidion	5.3	5.7
DE8	Cleidion bracteosum	Euphorbiaceae	Cleidion	29.9	5.8
DE8	Cleidion bracteosum	Euphorbiaceae	Cleidion	5.2	4.7
DE8	Cephalomappa sinensis	Euphorbiaceae	Cephalomappa	27.4	9.2
DE8	Cleidion bracteosum	Euphorbiaceae	Cleidion	5.9	5.1
DE8	Cleistanthus petelotii	Phyllanthaceae	Cleistanthus	32.2	8.1
DE8	Cleidion bracteosum	Euphorbiaceae	Cleidion	8.4	5.9
DE8	Cleistanthus petelotii	Phyllanthaceae	Cleistanthus	3.8	2.3
DE8	Jatropha curcas	Euphorbiaceae	Jatropha	33	11.2
DE8	Cleidion bracteosum	Euphorbiaceae	Cleidion	11.1	6.7
DE8	Tinospora sagittata	Menispermaceae	Tinospora	26.6	8.4
DE8	Cleidion bracteosum	Euphorbiaceae	Cleidion	11.3	8.1
DE8	Litsea variabilis var. oblonga	Lauraceae	Litsea	8.2	5.1
DE8	Cleidion bracteosum	Euphorbiaceae	Cleidion	11.5	7.1
DE8	Cleistanthus petelotii	Phyllanthaceae	Cleistanthus	21.3	8.3
DE8	Cleistanthus petelotii	Phyllanthaceae	Cleistanthus	16.6	7.2
DE8	Cleidion bracteosum	Euphorbiaceae	Cleidion	5.4	5.2
DE8	Cleistanthus petelotii	Phyllanthaceae	Cleistanthus	8.6	7.2
DE8	Cleidion bracteosum	Euphorbiaceae	Cleidion	9.2	5.1
DE8	Cleidion bracteosum	Euphorbiaceae	Cleidion	4.8	4.5
DE8	Cleistanthus petelotii	Phyllanthaceae	Cleistanthus	4.5	4.2
DE8	Cleistanthus petelotii	Phyllanthaceae	Cleistanthus	2.1	2.6
DE8	Litsea variabilis var. oblonga	Lauraceae	Litsea	2	2.7
DE8	Litsea variabilis var. oblonga	Lauraceae	Litsea	1.4	2.8
DE8	Antidesma montanum	Phyllanthaceae	Antidesma	7.7	5.2
DE8	Litsea variabilis var. oblonga	Lauraceae	Litsea	5.4	2
DE8	Leea indica	Vitaceae	Leea	2.1	2.8
DE8	Litsea variabilis var. oblonga	Lauraceae	Litsea	2.2	4.1
DE8	Cleidion bracteosum	Euphorbiaceae	Cleidion	10	6.1
DE8	Cleistanthus petelotii	Phyllanthaceae	Cleistanthus	11.1	5.1
DE8	Tinospora sagittata	Menispermaceae	Tinospora	16.5	11.1
DE8	Cleistanthus petelotii	Phyllanthaceae	Cleistanthus	16.9	10.2
DE8	Cephalomappa sinensis	Euphorbiaceae	Cephalomappa	17.8	9.8
DE8	Cephalomappa sinensis	Euphorbiaceae	Cephalomappa	10.3	9.2
DE8	Cleidion bracteosum	Euphorbiaceae	Cleidion	3	4.1
DE8	Cephalomappa sinensis	Euphorbiaceae	Cephalomappa	12	9.5
DE8	Ziziphus montana	Rhamnaceae	Ziziphus	79.2	12.4
DE8	Deutzianthus tonkinensis	Euphorbiaceae	Deutzianthus	61	13.4
DE8	Litsea variabilis var. oblonga	Lauraceae	Litsea	5.2	5.9
DE8	Cleistanthus petelotii	Phyllanthaceae	Cleistanthus	5.8	6.9
DE8	Cleidion bracteosum	Euphorbiaceae	Cleidion	24.3	7.2
DE8	Cleidion bracteosum	Euphorbiaceae	Cleidion	8.8	7.1
DE8	Cleidion bracteosum	Euphorbiaceae	Cleidion	9.3	6.9
DE8	Cleidion bracteosum	Euphorbiaceae	Cleidion	5	4.5
DE8	Cleidion bracteosum	Euphorbiaceae	Cleidion	6.4	4.7
DE9	Morus macroura	Moraceae	Morus	29.1	20
DE9	Cryptocarya lyoniifolia	Lauraceae	Cryptocarya	3.5	7
DE9	Citrus maxima	Rutaceae	Citrus	7.4	8.5
DE9	Glochidion ellipticum	Phyllanthaceae	Glochidion	12.5	14
DE9	Baccaurea ramiflora	Phyllanthaceae	Baccaurea	11.1	11
DE9	Baccaurea ramiflora	Phyllanthaceae	Baccaurea	14.6	13
DE9	Glochidion coccineum	Phyllanthaceae	Glochidion	1.7	2
DE9	Clerodendrum wallichii	Lamiaceae	Clerodendrum	1.7	3
DE9	Orophea polycarpa	Annonaceae	Orophea	1.5	3.5
DE9	Ficus hispida	Moraceae	Ficus	4.5	4
DE9	Litsea variabilis var. oblonga	Lauraceae	Litsea	1.9	3.5
DE9	Citrus maxima	Rutaceae	Citrus	5.7	4.5
DE9	Leea indica	Vitaceae	Leea	2.6	5
DE9	Cryptocarya lyoniifolia	Lauraceae	Cryptocarya	9.7	10
DE9	Catunaregam spinosa	Rubiaceae	Catunaregam	8.9	7
DE9	Litsea variabilis var. oblonga	Lauraceae	Litsea	5.1	5
DE9	Leea indica	Vitaceae	Leea	1.6	3.5
DE9	Citrus maxima	Rutaceae	Citrus	7.1	6.5
DE9	Leea indica	Vitaceae	Leea	3.5	6
DE9	Amesiodendron chinense	Sapindaceae	Amesiodendron	2.6	4.5
DE9	Litsea variabilis var. oblonga	Lauraceae	Litsea	2.7	5.5
DE9	Maclura cochinchinensis	Moraceae	Maclura	2.7	5.5
DE9	Excentrodendron tonkinense	Malvaceae	Excentrodendron	8.5	12
DE9	Litsea monopetala	Lauraceae	Litsea	17.7	16
DE9	Litsea variabilis var. oblonga	Lauraceae	Litsea	2.4	3.5
DE9	Micromelum integerrimum	Rutaceae	Micromelum	1.9	3.5
DE9	Leea indica	Vitaceae	Leea	3.7	7
DE9	Leea indica	Vitaceae	Leea	1.4	3
DE9	Leea indica	Vitaceae	Leea	1.7	3.5
DE9	Leea indica	Vitaceae	Leea	2	3.5
DE9	Leea indica	Vitaceae	Leea	2.4	4.5
DE9	Litsea variabilis var. oblonga	Lauraceae	Litsea	1.9	3.5
DE9	Garuga pinnata	Burseraceae	Garuga	87	27
DE9	Tarenna attenuata	Rubiaceae	Tarenna	6	6.5
DE9	Litsea variabilis var. oblonga	Lauraceae	Litsea	1.7	3.5
DE9	Catunaregam spinosa	Rubiaceae	Catunaregam	4.1	7
DE9	Sterculia monosperma	Malvaceae	Sterculia	1.5	3
DE9	Amesiodendron chinense	Sapindaceae	Amesiodendron	9.8	11
DE9	Bischofia javanica	Phyllanthaceae	Bischofia	22.1	16
DE9	Cryptocarya lyoniifolia	Lauraceae	Cryptocarya	2.4	4
DE9	Leea indica	Vitaceae	Leea	1.4	3
DE9	Cryptocarya lyoniifolia	Lauraceae	Cryptocarya	5.3	7.5
DE9	Antidesma japonicum	Phyllanthaceae	Antidesma	3.4	4
DE9	Dracontomelon duperreanum	Anacardiaceae	Dracontomelon	7	9
DE9	Ficus hispida	Moraceae	Ficus	1.3	3
DE9	Celtis timorensis	Cannabaceae	Celtis	1.4	3
DE9	Dracontomelon duperreanum	Anacardiaceae	Dracontomelon	9.6	10
DE9	Tarenna attenuata	Rubiaceae	Tarenna	8.3	8
DE9	Tetrapanax papyrifer	Araliaceae	Tetrapanax	4.6	4.5
DE9	Ficus hispida	Moraceae	Ficus	2.6	6
DE9	Sterculia monosperma	Malvaceae	Sterculia	11.4	8
DE9	Ficus hispida	Moraceae	Ficus	1.5	3
DE9	Sterculia monosperma	Malvaceae	Sterculia	4.1	5
DE9	Litsea variabilis var. oblonga	Lauraceae	Litsea	1.6	3
DE9	Clausena dunniana	Rutaceae	Clausena	6.6	7
DE9	Ficus cyrtophylla	Moraceae	Ficus	16.1	12
DE9	Ficus cyrtophylla	Moraceae	Ficus	3.4	3.5
DE9	Clausena anisum-olens	Rutaceae	Clausena	12.8	13
DE9	Clerodendrum wallichii	Lamiaceae	Clerodendrum	1.4	3
DE9	Strophioblachia fimbricalyx	Euphorbiaceae	Strophioblachia	1.4	2.5
DE9	Clausena dunniana	Rutaceae	Clausena	4	7
DE9	Clausena dunniana	Rutaceae	Clausena	6.5	7
DE9	Strophioblachia fimbricalyx	Euphorbiaceae	Strophioblachia	1.5	2
DE9	Sterculia monosperma	Malvaceae	Sterculia	4.6	7
DE9	Clausena dunniana	Rutaceae	Clausena	4.1	7
DE9	Clerodendrum wallichii	Lamiaceae	Clerodendrum	1.9	3
DE9	Clausena dunniana	Rutaceae	Clausena	1.7	3.5
DE9	Hydnocarpus hainanensis	Achariaceae	Hydnocarpus	2	4
DE9	Clausena dunniana	Rutaceae	Clausena	6.1	8.5
DE9	Lagerstroemia caudata	Lythraceae	Lagerstroemia	2.6	7
DE9	Clausena dunniana	Rutaceae	Clausena	12.3	11
DE9	Pavetta hongkongensis	Rubiaceae	Pavetta	6.9	3.5
DE9	Bridelia balansae	Phyllanthaceae	Bridelia	4.2	11
DE9	Bischofia javanica	Phyllanthaceae	Bischofia	25.7	19
DE9	Antidesma bunius	Phyllanthaceae	Antidesma	3.1	4
DE9	Litsea variabilis var. oblonga	Lauraceae	Litsea	3.9	5.5
DE9	Glochidion ellipticum	Phyllanthaceae	Glochidion	6.5	6
DE9	Canarium subulatum	Burseraceae	Canarium	4.3	7.5
DE9	Litsea variabilis var. oblonga	Lauraceae	Litsea	5	6.5
DE9	Fraxinus insularis	Oleaceae	Fraxinus	2.4	4
DE9	Litsea variabilis var. oblonga	Lauraceae	Litsea	2.1	3.5
DE9	Maesa perlarius	Primulaceae	Maesa	2.5	5.5
DE9	Aglaia_sp1	Meliaceae	Aglaia	1.5	2
DE9	Leea indica	Vitaceae	Leea	1.7	5
DE9	Ficus hispida	Moraceae	Ficus	2	3.5
DE9	Litsea variabilis var. oblonga	Lauraceae	Litsea	1.1	2
DE9	Leea indica	Vitaceae	Leea	1.6	2
DE9	Litsea variabilis var. oblonga	Lauraceae	Litsea	7.3	5
DE9	Hydnocarpus hainanensis	Achariaceae	Hydnocarpus	2.5	3.5
DE9	Ficus oligodon	Moraceae	Ficus	16.5	12
DE9	Leea indica	Vitaceae	Leea	1.9	4
DE9	Ficus oligodon	Moraceae	Ficus	8.3	7.5
DE9	Litsea variabilis var. oblonga	Lauraceae	Litsea	4.9	5.5
DE9	Leea indica	Vitaceae	Leea	1.9	3.5
DE9	Leea indica	Vitaceae	Leea	3.5	6
DE9	Litsea variabilis var. oblonga	Lauraceae	Litsea	1.6	2.5
DE9	Leea indica	Vitaceae	Leea	3.5	6
DE9	Litsea variabilis var. oblonga	Lauraceae	Litsea	4.3	6.5
DE9	Sterculia monosperma	Malvaceae	Sterculia	6.5	6
DE9	Ficus glaberrima	Moraceae	Ficus	14.2	12
DE9	Bischofia javanica	Phyllanthaceae	Bischofia	9.3	8
DE9	Litsea variabilis var. oblonga	Lauraceae	Litsea	2	3
DE9	Heteropanax fragrans	Araliaceae	Heteropanax	50.5	26
DE9	Leea indica	Vitaceae	Leea	2	3.5
DE9	Litsea variabilis var. oblonga	Lauraceae	Litsea	2.8	4
DE9	Amesiodendron chinense	Sapindaceae	Amesiodendron	5.7	7.5
DE9	Cratoxylum formosum subsp. pruniflorum	Hypericaceae	Cratoxylum	3.7	5
DE9	Tarenna attenuata	Rubiaceae	Tarenna	8.8	6
DE9	Ficus hispida	Moraceae	Ficus	2.9	6
DE9	Heteropanax fragrans	Araliaceae	Heteropanax	11	12
DE9	Amesiodendron chinense	Sapindaceae	Amesiodendron	5.6	8
DE9	Clausena dunniana	Rutaceae	Clausena	10.2	8
DE9	Clausena dunniana	Rutaceae	Clausena	7.1	9
DE9	Canarium subulatum	Burseraceae	Canarium	16.8	9
DE9	Aglaia_sp1	Meliaceae	Aglaia	4	3.5
DE9	Diospyros xiangguiensis	Ebenaceae	Diospyros	5.8	8
DE9	Litsea variabilis var. oblonga	Lauraceae	Litsea	3.1	4
DE9	Clausena dunniana	Rutaceae	Clausena	2.2	3
DE9	Clausena dunniana	Rutaceae	Clausena	2.7	4.5
DE9	Lagerstroemia caudata	Lythraceae	Lagerstroemia	8.2	7
DE9	Strophioblachia fimbricalyx	Euphorbiaceae	Strophioblachia	1.6	2
DE9	Strophioblachia fimbricalyx	Euphorbiaceae	Strophioblachia	2.6	3
DE9	Citrus maxima	Rutaceae	Citrus	3	4
DE9	Clerodendrum wallichii	Lamiaceae	Clerodendrum	2.4	3.5
DE9	Strophioblachia fimbricalyx	Euphorbiaceae	Strophioblachia	2.3	3
DE9	Strophioblachia fimbricalyx	Euphorbiaceae	Strophioblachia	1.5	2
DE9	Strophioblachia fimbricalyx	Euphorbiaceae	Strophioblachia	2.1	3.5
DE9	Diospyros xiangguiensis	Ebenaceae	Diospyros	1.6	3.5
DE9	Strophioblachia fimbricalyx	Euphorbiaceae	Strophioblachia	1.9	3.5
DE9	Strophioblachia fimbricalyx	Euphorbiaceae	Strophioblachia	1.7	3
DE9	Aglaia lawii	Meliaceae	Aglaia	52.1	29
DE9	Caryota obtusa	Arecaceae	Caryota	7.9	6
DE9	Strophioblachia fimbricalyx	Euphorbiaceae	Strophioblachia	2.8	3
DE9	Strophioblachia fimbricalyx	Euphorbiaceae	Strophioblachia	2.1	3.5
DE9	Clausena dunniana	Rutaceae	Clausena	40.5	20
DE10	Dracontomelon duperreanum	Anacardiaceae	Dracontomelon	5.3	7
DE10	Leea indica	Vitaceae	Leea	2	4.5
DE10	Euonymus dielsianus	Celastraceae	Euonymus	2.5	2.5
DE10	Canarium subulatum	Burseraceae	Canarium	12.5	13
DE10	Leea indica	Vitaceae	Leea	1.6	2.5
DE10	Litsea variabilis var. oblonga	Lauraceae	Litsea	1.8	2.5
DE10	Cinnamomum burmanni	Lauraceae	Cinnamomum	18.6	15
DE10	Leea indica	Vitaceae	Leea	1.7	3
DE10	Euonymus dielsianus	Celastraceae	Euonymus	1	4.5
DE10	Ficus hispida	Moraceae	Ficus	1.4	2.5
DE10	Ficus hispida	Moraceae	Ficus	1.9	3.5
DE10	Litsea variabilis var. oblonga	Lauraceae	Litsea	1.8	2.5
DE10	Litsea variabilis var. oblonga	Lauraceae	Litsea	4	4.5
DE10	Litsea variabilis var. oblonga	Lauraceae	Litsea	8.5	7.5
DE10	Litsea variabilis var. oblonga	Lauraceae	Litsea	1	1.8
DE10	Leea indica	Vitaceae	Leea	3.2	6
DE10	Leea indica	Vitaceae	Leea	3.4	6.5
DE10	Leea indica	Vitaceae	Leea	2.7	5.5
DE10	Litsea variabilis var. oblonga	Lauraceae	Litsea	1.1	2
DE10	Leea indica	Vitaceae	Leea	1	2
DE10	Leea indica	Vitaceae	Leea	2	4.5
DE10	Leea indica	Vitaceae	Leea	1.6	3
DE10	Heteropanax fragrans	Araliaceae	Heteropanax	3.5	5
DE10	Strophioblachia fimbricalyx	Euphorbiaceae	Strophioblachia	0.8	1.8
DE10	Litsea variabilis var. oblonga	Lauraceae	Litsea	1.5	2.5
DE10	Litsea variabilis var. oblonga	Lauraceae	Litsea	3.4	5
DE10	Litsea variabilis var. oblonga	Lauraceae	Litsea	1.1	2
DE10	Litsea variabilis var. oblonga	Lauraceae	Litsea	2.9	4.5
DE10	Antidesma bunius	Phyllanthaceae	Antidesma	2.6	4.5
DE10	Bischofia javanica	Phyllanthaceae	Bischofia	32.1	21
DE10	Cryptocarya lyoniifolia	Lauraceae	Cryptocarya	9	10
DE10	Cryptocarya lyoniifolia	Lauraceae	Cryptocarya	12.4	13
DE10	Cryptocarya lyoniifolia	Lauraceae	Cryptocarya	1.2	2
DE10	Litsea variabilis var. oblonga	Lauraceae	Litsea	2.1	3.5
DE10	Leea indica	Vitaceae	Leea	1.2	2.5
DE10	Cryptocarya lyoniifolia	Lauraceae	Cryptocarya	9.3	12
DE10	Adenanthera microsperma	Fabaceae	Adenanthera	1.1	2.5
DE10	Leea indica	Vitaceae	Leea	1.1	1.8
DE10	Maclura cochinchinensis	Moraceae	Maclura	1.3	3
DE10	Litsea variabilis var. oblonga	Lauraceae	Litsea	2.7	3.5
DE10	Antidesma bunius	Phyllanthaceae	Antidesma	2.8	4.5
DE10	Baccaurea ramiflora	Phyllanthaceae	Baccaurea	1.1	1.8
DE10	Cryptocarya lyoniifolia	Lauraceae	Cryptocarya	14.8	13
DE10	Litsea variabilis var. oblonga	Lauraceae	Litsea	2.6	4.5
DE10	Tetrapanax papyrifer	Araliaceae	Tetrapanax	3.2	2.5
DE10	Strophioblachia fimbricalyx	Euphorbiaceae	Strophioblachia	1.2	1.6
DE10	Cryptocarya lyoniifolia	Lauraceae	Cryptocarya	14	15
DE10	Cryptocarya lyoniifolia	Lauraceae	Cryptocarya	2.5	4
DE10	Cryptocarya lyoniifolia	Lauraceae	Cryptocarya	0.8	1.6
DE10	Cryptocarya lyoniifolia	Lauraceae	Cryptocarya	2	3.5
DE10	Ficus cyrtophylla	Moraceae	Ficus	1.1	2.5
DE10	Cryptocarya lyoniifolia	Lauraceae	Cryptocarya	4.3	5.5
DE10	Tetrapanax papyrifer	Araliaceae	Tetrapanax	3.7	2.5
DE10	Cryptocarya lyoniifolia	Lauraceae	Cryptocarya	7.2	9
DE10	Cryptocarya lyoniifolia	Lauraceae	Cryptocarya	5.7	8
DE10	Cinnamomum burmanni	Lauraceae	Cinnamomum	2.8	3.5
DE10	Cryptocarya lyoniifolia	Lauraceae	Cryptocarya	15.4	14.5
DE10	Cryptocarya lyoniifolia	Lauraceae	Cryptocarya	4.8	6
DE10	Litsea variabilis var. oblonga	Lauraceae	Litsea	1.6	2.5
DE10	Cryptocarya lyoniifolia	Lauraceae	Cryptocarya	7.1	9
DE10	Sinosideroxylon pedunculatum	Sapotaceae	Sinosideroxylon	1.5	3
DE10	Cryptocarya lyoniifolia	Lauraceae	Cryptocarya	5.7	7
DE10	Cryptocarya lyoniifolia	Lauraceae	Cryptocarya	4.8	7
DE10	Cryptocarya lyoniifolia	Lauraceae	Cryptocarya	3.2	5.5
DE10	Litsea variabilis var. oblonga	Lauraceae	Litsea	1.3	2.5
DE10	Cryptocarya lyoniifolia	Lauraceae	Cryptocarya	20	18
DE10	Ficus hispida	Moraceae	Ficus	1.3	2.5
DE10	Cryptocarya lyoniifolia	Lauraceae	Cryptocarya	9.5	12
DE10	Cryptocarya lyoniifolia	Lauraceae	Cryptocarya	4.9	6
DE10	Catunaregam spinosa	Rubiaceae	Catunaregam	3.9	5
DE10	Litsea variabilis var. oblonga	Lauraceae	Litsea	1.2	1.8
DE10	Adenanthera microsperma	Fabaceae	Adenanthera	1.5	2.5
DE10	Leea indica	Vitaceae	Leea	1.9	3
DE10	Heteropanax fragrans	Araliaceae	Heteropanax	1	1.5
DE10	Litsea variabilis var. oblonga	Lauraceae	Litsea	1.4	2.5
DE10	Leea indica	Vitaceae	Leea	1.7	2.5
DE10	Ficus hispida	Moraceae	Ficus	1.5	2.5
DE10	Celtis timorensis	Cannabaceae	Celtis	1.3	2
DE10	Leea indica	Vitaceae	Leea	1.2	2
DE10	Litsea variabilis var. oblonga	Lauraceae	Litsea	1.1	2
DE10	Litsea variabilis var. oblonga	Lauraceae	Litsea	2.8	3.5
DE10	Ficus hispida	Moraceae	Ficus	1.3	2.5
DE10	Ficus hispida	Moraceae	Ficus	1.2	2
DE10	Viburnum triplinerve	Adoxaceae	Viburnum	24.8	21
DE10	Leea indica	Vitaceae	Leea	1.6	3
DE10	Strophioblachia fimbricalyx	Euphorbiaceae	Strophioblachia	1.6	2.5
DE10	Litsea variabilis var. oblonga	Lauraceae	Litsea	2.8	4.5
DE10	Leea indica	Vitaceae	Leea	1.3	2.5
DE10	Strophioblachia fimbricalyx	Euphorbiaceae	Strophioblachia	1.3	2
DE10	Clausena anisum-olens	Rutaceae	Clausena	8.5	10
DE10	Cryptocarya lyoniifolia	Lauraceae	Cryptocarya	11.3	11.5
DE10	Claoxylon indicum	Euphorbiaceae	Claoxylon	35.1	18
DE10	Litsea variabilis var. oblonga	Lauraceae	Litsea	1.6	2.5
DE10	Litsea variabilis var. oblonga	Lauraceae	Litsea	1.2	2
DE10	Litsea variabilis var. oblonga	Lauraceae	Litsea	1.4	2
DE10	Cryptocarya lyoniifolia	Lauraceae	Cryptocarya	13.6	14
DE10	Euonymus dielsianus	Celastraceae	Euonymus	1.4	2
DE10	Cryptocarya lyoniifolia	Lauraceae	Cryptocarya	8.9	12.5
DE10	Cryptocarya lyoniifolia	Lauraceae	Cryptocarya	20	20
DE10	Litsea variabilis var. oblonga	Lauraceae	Litsea	2.8	6
DE10	Cryptocarya lyoniifolia	Lauraceae	Cryptocarya	12.6	14
DE10	Celtis timorensis	Cannabaceae	Celtis	1.6	3.5
DE10	Cryptocarya lyoniifolia	Lauraceae	Cryptocarya	2	2.5
DE10	Litsea variabilis var. oblonga	Lauraceae	Litsea	1.9	2.5
DE10	Litsea variabilis var. oblonga	Lauraceae	Litsea	1.5	2
DE10	Maesa perlarius	Primulaceae	Maesa	2.8	5.5
DE10	Celtis timorensis	Cannabaceae	Celtis	2.2	4
DE10	Litsea variabilis var. oblonga	Lauraceae	Litsea	2.8	3.5
DE10	Litsea variabilis var. oblonga	Lauraceae	Litsea	1.4	3
DE10	Cryptocarya lyoniifolia	Lauraceae	Cryptocarya	9.6	11
DE10	Catunaregam spinosa	Rubiaceae	Catunaregam	12	11
DE10	Celtis timorensis	Cannabaceae	Celtis	1	2
DE10	Celtis timorensis	Cannabaceae	Celtis	1.2	2
DE10	Litsea variabilis var. oblonga	Lauraceae	Litsea	2.3	3
DE10	Leea indica	Vitaceae	Leea	1.5	3
DE10	Leea indica	Vitaceae	Leea	1.1	2
DE10	Leea indica	Vitaceae	Leea	2.3	3.5
DE10	Litsea variabilis var. oblonga	Lauraceae	Litsea	1.9	2
DE10	Litsea variabilis var. oblonga	Lauraceae	Litsea	3.3	4
DE10	Cryptocarya lyoniifolia	Lauraceae	Cryptocarya	1.1	2
DE10	Ficus hispida	Moraceae	Ficus	1.2	2
DE10	Cryptocarya lyoniifolia	Lauraceae	Cryptocarya	19.5	18
DE10	Vitex kwangsiensis	Lamiaceae	Vitex	6.7	8.5
DE10	Leea indica	Vitaceae	Leea	1.4	2.5
DE10	Litsea variabilis var. oblonga	Lauraceae	Litsea	2.3	3
DE10	Litsea variabilis var. oblonga	Lauraceae	Litsea	1.8	3
DE10	Caryota obtusa	Arecaceae	Caryota	17.5	17
DE10	Maesa perlarius	Primulaceae	Maesa	1.6	3.5
DE10	Leea indica	Vitaceae	Leea	1.2	2
DE10	Ficus auriculata	Moraceae	Ficus	2.4	3
DE10	Ficus hispida	Moraceae	Ficus	5.1	6.5
DE10	Ficus hispida	Moraceae	Ficus	1.6	3
DE10	Brassaiopsis glomerulata	Araliaceae	Brassaiopsis	4.1	4.5
DE10	Clerodendrum wallichii	Lamiaceae	Clerodendrum	1.4	2.5
DE10	Ficus hispida	Moraceae	Ficus	2.1	4
DE10	Clerodendrum wallichii	Lamiaceae	Clerodendrum	1.6	2
DE10	Cipadessa baccifera	Meliaceae	Cipadessa	2.1	3.5
DE10	Strophioblachia fimbricalyx	Euphorbiaceae	Strophioblachia	1.7	2
DE10	Litsea variabilis var. oblonga	Lauraceae	Litsea	1	2
DE10	Litsea variabilis var. oblonga	Lauraceae	Litsea	2.4	5
DE10	Ficus hispida	Moraceae	Ficus	1.2	3
DE10	Canarium subulatum	Burseraceae	Canarium	7.5	12
DE10	Ficus hispida	Moraceae	Ficus	1.7	3
DE10	Celtis timorensis	Cannabaceae	Celtis	2.9	5.5
DE10	Catunaregam spinosa	Rubiaceae	Catunaregam	6.2	5
DE10	Ficus hispida	Moraceae	Ficus	1.4	2.5
DE10	Ficus hispida	Moraceae	Ficus	1.4	2.5
DE10	Ficus hispida	Moraceae	Ficus	1.4	2.5
DE10	Vitex kwangsiensis	Lamiaceae	Vitex	1.2	2.5
DE10	Ficus hispida	Moraceae	Ficus	1.3	2
DE10	Ardisia thyrsiflora	Primulaceae	Ardisia	1.7	2.5
DE10	Cryptocarya lyoniifolia	Lauraceae	Cryptocarya	5.9	8.5
DE10	Ardisia thyrsiflora	Primulaceae	Ardisia	1.7	2.5
DE10	Litsea variabilis var. oblonga	Lauraceae	Litsea	1.7	2
DE10	Litsea variabilis var. oblonga	Lauraceae	Litsea	3.9	4.5
DE10	Ficus hispida	Moraceae	Ficus	4.9	6.5
DE10	Ficus hispida	Moraceae	Ficus	2.6	4
DE10	Cryptocarya lyoniifolia	Lauraceae	Cryptocarya	3	3
DE10	Cryptocarya lyoniifolia	Lauraceae	Cryptocarya	11.3	15
DE10	Dracontomelon duperreanum	Anacardiaceae	Dracontomelon	45.5	25
DE10	Ficus hispida	Moraceae	Ficus	1.4	2.5
DE10	Antidesma bunius	Phyllanthaceae	Antidesma	2.3	3.5
DE10	Orophea polycarpa	Annonaceae	Orophea	1.1	2
DE10	Ficus hispida	Moraceae	Ficus	1.5	2.5
DE10	Litsea variabilis var. oblonga	Lauraceae	Litsea	2.2	4
DE10	Litsea variabilis var. oblonga	Lauraceae	Litsea	1.6	2.5
DE10	Litsea variabilis var. oblonga	Lauraceae	Litsea	1.2	2
DE10	Lagerstroemia caudata	Lythraceae	Lagerstroemia	3.6	4.5
DE10	Cryptocarya lyoniifolia	Lauraceae	Cryptocarya	11	13
DE10	Litsea variabilis var. oblonga	Lauraceae	Litsea	1.8	2.5
DE10	Cryptocarya lyoniifolia	Lauraceae	Cryptocarya	3.8	5.5
DE10	Euonymus dielsianus	Celastraceae	Euonymus	1.5	2
DE10	Catunaregam spinosa	Rubiaceae	Catunaregam	1.8	4
DE10	Antidesma bunius	Phyllanthaceae	Antidesma	1.3	2.5
LS1	Orophea polycarpa	Annonaceae	Orophea	2.3	4.1
LS1	Orophea polycarpa	Annonaceae	Orophea	3.9	4.9
LS1	Ardisia thyrsiflora	Primulaceae	Ardisia	1.2	2.9
LS1	Sterculia monosperma	Malvaceae	Sterculia	1.2	1.9
LS1	Streblus tonkinensis	Moraceae	Streblus	9.5	10.5
LS1	Tetrastigma planicaule	Vitaceae	Tetrastigma	2.8	17
LS1	Pterospermum truncatolobatum	Malvaceae	Pterospermum	6	9.8
LS1	Streblus tonkinensis	Moraceae	Streblus	7.8	5.9
LS1	Orophea polycarpa	Annonaceae	Orophea	1.5	1.9
LS1	Streblus tonkinensis	Moraceae	Streblus	1.6	2.5
LS1	Premna fulva	Lamiaceae	Premna	4.3	15
LS1	Premna fulva	Lamiaceae	Premna	4.7	19
LS1	Premna fulva	Lamiaceae	Premna	2.1	13
LS1	Diplodiscus trichospermus	Malvaceae	Diplodiscus	15.3	10.5
LS1	Orophea polycarpa	Annonaceae	Orophea	1.4	2.5
LS1	Streblus tonkinensis	Moraceae	Streblus	1.5	2.3
LS1	Streblus tonkinensis	Moraceae	Streblus	1.2	2.4
LS1	Streblus tonkinensis	Moraceae	Streblus	3	4.1
LS1	Streblus tonkinensis	Moraceae	Streblus	2.5	2.1
LS1	Orophea polycarpa	Annonaceae	Orophea	2.8	4.5
LS1	Streblus tonkinensis	Moraceae	Streblus	12	8.9
LS1	Premna fulva	Lamiaceae	Premna	4.5	20
LS1	Orophea polycarpa	Annonaceae	Orophea	8.5	8.5
LS1	Sterculia monosperma	Malvaceae	Sterculia	2.9	4.9
LS1	Diplodiscus trichospermus	Malvaceae	Diplodiscus	24.4	18.9
LS1	Tetrastigma planicaule	Vitaceae	Tetrastigma	9	22
LS1	Sterculia monosperma	Malvaceae	Sterculia	3.8	5.1
LS1	Streblus tonkinensis	Moraceae	Streblus	11.1	6.9
LS1	Streblus tonkinensis	Moraceae	Streblus	1.6	2.3
LS1	Pterolobium punctatum	Fabaceae	Pterolobium	4.7	18
LS1	Pterospermum truncatolobatum	Malvaceae	Pterospermum	1.5	3.1
LS1	Streblus tonkinensis	Moraceae	Streblus	4.1	5.4
LS1	Orophea polycarpa	Annonaceae	Orophea	3.1	5.1
LS1	Streblus tonkinensis	Moraceae	Streblus	8.1	9.8
LS1	Orophea polycarpa	Annonaceae	Orophea	1.9	2.3
LS1	Sterculia monosperma	Malvaceae	Sterculia	23	10.8
LS1	Streblus tonkinensis	Moraceae	Streblus	5.5	8.9
LS1	Glochidion coccineum	Phyllanthaceae	Glochidion	8.1	12
LS1	Orophea polycarpa	Annonaceae	Orophea	3.5	3.9
LS1	Ventilago leiocarpa	Rhamnaceae	Ventilago	4.1	3.1
LS1	Pterospermum truncatolobatum	Malvaceae	Pterospermum	8.9	8.3
LS1	Streblus tonkinensis	Moraceae	Streblus	3.6	5.4
LS1	Sterculia monosperma	Malvaceae	Sterculia	13	7.9
LS1	Cipadessa baccifera	Meliaceae	Cipadessa	8.9	8.5
LS1	Streblus tonkinensis	Moraceae	Streblus	3.2	2.5
LS1	Streblus tonkinensis	Moraceae	Streblus	2.4	3.9
LS1	Urceola rosea	Apocynaceae	Urceola	7.5	22
LS1	Rinorea bengalensis	Violaceae	Rinorea	2.5	4.5
LS1	Premna fulva	Lamiaceae	Premna	4.7	18
LS1	Orophea polycarpa	Annonaceae	Orophea	4.6	4.1
LS1	Streblus tonkinensis	Moraceae	Streblus	2.1	1.9
LS1	Streblus tonkinensis	Moraceae	Streblus	7.5	8.9
LS1	Euonymus dielsianus	Celastraceae	Euonymus	2.7	2.6
LS1	Streblus tonkinensis	Moraceae	Streblus	5.7	3.9
LS1	Streblus tonkinensis	Moraceae	Streblus	4.7	3.1
LS1	Streblus tonkinensis	Moraceae	Streblus	1.9	2.6
LS1	Sterculia monosperma	Malvaceae	Sterculia	19.2	9.3
LS1	Premna fulva	Lamiaceae	Premna	5	17.8
LS1	Streblus tonkinensis	Moraceae	Streblus	1.2	1.9
LS1	Streblus tonkinensis	Moraceae	Streblus	7.8	8.3
LS1	Champereia manillana var. longistaminea	Opiliaceae	Champereia	3.2	3.9
LS1	Garcinia paucinervis	Clusiaceae	Garcinia	1.5	2.2
LS1	Pterolobium punctatum	Fabaceae	Pterolobium	3.9	17
LS1	Pterolobium punctatum	Fabaceae	Pterolobium	2.9	15
LS1	Streblus tonkinensis	Moraceae	Streblus	1.7	1.9
LS1	Laurocerasus spinulosa	Rosaceae	Lauro-cerasus	2.6	4.1
LS1	Orophea polycarpa	Annonaceae	Orophea	3.2	4
LS1	Pterolobium punctatum	Fabaceae	Pterolobium	2.8	15m
LS1	Streblus tonkinensis	Moraceae	Streblus	13.4	3.2
LS1	Orophea polycarpa	Annonaceae	Orophea	1.9	2
LS1	Aidia cochinchinensis	Rubiaceae	Aidia	3.7	2.5
LS1	Vitex kwangsiensis	Lamiaceae	Vitex	15.3	7.5
LS1	Lauro-cerasus_sp1	Rosaceae	Lauro-cerasus	2.4	2.5
LS1	Streblus tonkinensis	Moraceae	Streblus	9.8	5.1
LS1	Vitex kwangsiensis	Lamiaceae	Vitex	14	6.6
LS1	Streblus tonkinensis	Moraceae	Streblus	8	3.8
LS1	Strophioblachia fimbricalyx	Euphorbiaceae	Strophioblachia	1.2	1.8
LS1	Streblus tonkinensis	Moraceae	Streblus	9.5	3.8
LS1	Vitex kwangsiensis	Lamiaceae	Vitex	29.9	7.8
LS1	Orophea polycarpa	Annonaceae	Orophea	1.9	3
LS1	Streblus tonkinensis	Moraceae	Streblus	2.6	3.2
LS1	Euonymus dielsianus	Celastraceae	Euonymus	3.4	3
LS1	Sterculia monosperma	Malvaceae	Sterculia	4.8	4.5
LS1	Streblus tonkinensis	Moraceae	Streblus	1.6	2
LS1	Champereia manillana var. longistaminea	Opiliaceae	Champereia	3.4	2.8
LS1	Streblus tonkinensis	Moraceae	Streblus	10	5.2
LS1	Streblus tonkinensis	Moraceae	Streblus	8	3.8
LS1	Lirianthe fistulosa	Magnoliaceae	Lirianthe	2	3
LS1	Streblus tonkinensis	Moraceae	Streblus	3.9	2
LS1	Streblus tonkinensis	Moraceae	Streblus	4.1	3.2
LS1	Champereia manillana var. longistaminea	Opiliaceae	Champereia	4.3	3.6
LS1	Streblus tonkinensis	Moraceae	Streblus	2.8	3.5
LS1	Champereia manillana var. longistaminea	Opiliaceae	Champereia	2.5	2.3
LS1	Streblus tonkinensis	Moraceae	Streblus	1.9	1.8
LS1	Pterolobium punctatum	Fabaceae	Pterolobium	6.9	20m
LS1	Orophea polycarpa	Annonaceae	Orophea	4.6	3.6
LS1	Streblus tonkinensis	Moraceae	Streblus	11	6.2
LS1	Sterculia monosperma	Malvaceae	Sterculia	2.5	3
LS1	Sterculia monosperma	Malvaceae	Sterculia	2.5	2.2
LS1	Champereia manillana var. longistaminea	Opiliaceae	Champereia	5.2	5.3
LS1	Streblus tonkinensis	Moraceae	Streblus	1.9	2.5
LS1	Sterculia monosperma	Malvaceae	Sterculia	5	6
LS1	Streblus tonkinensis	Moraceae	Streblus	2.5	3.5
LS1	Orophea polycarpa	Annonaceae	Orophea	1.8	3
LS1	Streblus tonkinensis	Moraceae	Streblus	2.9	3.1
LS1	Vitex kwangsiensis	Lamiaceae	Vitex	22.5	7
LS1	Streblus tonkinensis	Moraceae	Streblus	4.7	4.5
LS1	Sterculia monosperma	Malvaceae	Sterculia	3	3.5
LS1	Diospyros siderophylla	Ebenaceae	Diospyros	1.2	2.3
LS1	Sterculia monosperma	Malvaceae	Sterculia	23.5	7.8
LS1	Garcinia paucinervis	Clusiaceae	Garcinia	2.7	2.8
LS1	Orophea polycarpa	Annonaceae	Orophea	2.2	3.8
LS1	Garcinia paucinervis	Clusiaceae	Garcinia	2.5	3.4
LS1	Champereia manillana var. longistaminea	Opiliaceae	Champereia	3	3.8
LS1	Hydnocarpus hainanensis	Achariaceae	Hydnocarpus	3.3	4
LS1	Radermachera frondosa	Bignoniaceae	Radermachera	1.5	1.4
LS1	Streblus tonkinensis	Moraceae	Streblus	4.8	4.6
LS1	Orophea polycarpa	Annonaceae	Orophea	1.3	1.8
LS1	Orophea polycarpa	Annonaceae	Orophea	2.5	2.6
LS1	Sterculia monosperma	Malvaceae	Sterculia	2.2	3.2
LS1	Streblus tonkinensis	Moraceae	Streblus	2.7	2.5
LS2	Orophea polycarpa	Annonaceae	Orophea	2.7	2.5
LS2	Orophea polycarpa	Annonaceae	Orophea	1.5	2.6
LS2	Ardisia quinquegona	Primulaceae	Ardisia	1.6	2.2
LS2	Sterculia lanceolata	Malvaceae	Sterculia	2.6	2.5
LS2	Orophea polycarpa	Annonaceae	Orophea	2.2	2.5
LS2	Deutzianthus tonkinensis	Euphorbiaceae	Deutzianthus	16.7	12.5
LS2	Orophea polycarpa	Annonaceae	Orophea	4.4	4
LS2	Orophea polycarpa	Annonaceae	Orophea	1.6	3
LS2	Sterculia monosperma	Malvaceae	Sterculia	2.5	4
LS2	Orophea polycarpa	Annonaceae	Orophea	4.3	5.1
LS2	Antidesma montanum	Phyllanthaceae	Antidesma	6	6.3
LS2	Antidesma montanum	Phyllanthaceae	Antidesma	6	6
LS2	Ardisia quinquegona	Primulaceae	Ardisia	14	7.5
LS2	Orophea polycarpa	Annonaceae	Orophea	2.8	3.8
LS2	Orophea polycarpa	Annonaceae	Orophea	2.8	4.6
LS2	Helicia_sp1	Proteaceae	Helicia	6.5	6.6
LS2	Helicia_sp1	Proteaceae	Helicia	3.9	4.5
LS2	Helicia_sp1	Proteaceae	Helicia	2.2	3.5
LS2	Lithocarpus areca	Fagaceae	Lithocarpus	2.5	5
LS2	Orophea polycarpa	Annonaceae	Orophea	2.8	4.8
LS2	Orophea polycarpa	Annonaceae	Orophea	2.3	5.2
LS2	Bischofia javanica	Phyllanthaceae	Bischofia	4	5.8
LS2	Litsea variabilis var. oblonga	Lauraceae	Litsea	7.6	7.2
LS2	Lithocarpus areca	Fagaceae	Lithocarpus	3.7	3.8
LS2	Streblus tonkinensis	Moraceae	Streblus	2.6	4.3
LS2	Ardisia quinquegona	Primulaceae	Ardisia	13	9.5
LS2	Streblus tonkinensis	Moraceae	Streblus	213	3
LS2	Lagerstroemia suprareticulata	Lythraceae	Lagerstroemia	4.6	7.8
LS2	Ardisia quinquegona	Primulaceae	Ardisia	2.5	3.4
LS2	Ardisia quinquegona	Primulaceae	Ardisia	2.6	5
LS2	Garuga forrestii	Burseraceae	Garuga	45.7	20
LS2	Streblus tonkinensis	Moraceae	Streblus	1.3	2.3
LS2	Streblus tonkinensis	Moraceae	Streblus	3.2	3.6
LS2	Helicia_sp1	Proteaceae	Helicia	1.4	2.5
LS2	Orophea polycarpa	Annonaceae	Orophea	2.1	6.8
LS2	Premna fulva	Lamiaceae	Premna	5.1	30m
LS2	Sterculia lanceolata	Malvaceae	Sterculia	6	6
LS2	Bennettiodendron leprosipes	Salicaceae	Bennettiodendron	2.4	2
LS2	Streblus tonkinensis	Moraceae	Streblus	2.3	4.2
LS2	Cychidendron guangxiensis	Fabaceae	Cylindrokelupha	14	7
LS2	Orophea polycarpa	Annonaceae	Orophea	3.2	4
LS2	Orophea polycarpa	Annonaceae	Orophea	2.6	3
LS2	Kadsura heteroclita	Schisandraceae	Kadsura	5.8	30m
LS2	Ardisia quinquegona	Primulaceae	Ardisia	1.4	2.3
LS2	Orophea polycarpa	Annonaceae	Orophea	1.4	3.3
LS2	Orophea polycarpa	Annonaceae	Orophea	1.4	3.6
LS2	Sterculia lanceolata	Malvaceae	Sterculia	9.8	8.5
LS2	Antidesma montanum	Phyllanthaceae	Antidesma	4	5.7
LS2	Streblus tonkinensis	Moraceae	Streblus	2.8	4.5
LS2	Litsea variabilis var. oblonga	Lauraceae	Litsea	4	5.3
LS2	Orophea polycarpa	Annonaceae	Orophea	4.3	5.5
LS2	Sterculia monosperma	Malvaceae	Sterculia	2.7	3.5
LS2	Bridelia balansae	Phyllanthaceae	Bridelia	3.8	7
LS2	Bennettiodendron leprosipes	Salicaceae	Bennettiodendron	1.4	2
LS2	Ardisia quinquegona	Primulaceae	Ardisia	3.8	3.8
LS2	Streblus tonkinensis	Moraceae	Streblus	3.6	5
LS2	Streblus tonkinensis	Moraceae	Streblus	2.2	3.2
LS2	Streblus tonkinensis	Moraceae	Streblus	6.3	6
LS2	Heteropanax fragrans	Araliaceae	Heteropanax	7.6	10
LS2	Antidesma montanum	Phyllanthaceae	Antidesma	6.4	8
LS2	Bennettiodendron leprosipes	Salicaceae	Bennettiodendron	2	3.8
LS2	Deutzianthus tonkinensis	Euphorbiaceae	Deutzianthus	49.2	21
LS2	Streblus tonkinensis	Moraceae	Streblus	3.8	6
LS2	Orophea polycarpa	Annonaceae	Orophea	1.6	3.8
LS2	Antidesma montanum	Phyllanthaceae	Antidesma	3.8	6.1
LS2	Antidesma montanum	Phyllanthaceae	Antidesma	2.1	3.2
LS2	Streblus tonkinensis	Moraceae	Streblus	3.9	5.3
LS2	Streblus tonkinensis	Moraceae	Streblus	2.1	3.5
LS2	Bennettiodendron leprosipes	Salicaceae	Bennettiodendron	4	6.5
LS2	Antidesma montanum	Phyllanthaceae	Antidesma	2	3.5
LS2	Streblus tonkinensis	Moraceae	Streblus	2.2	3
LS2	Streblus tonkinensis	Moraceae	Streblus	3.8	6.5
LS2	Heteropanax fragrans	Araliaceae	Heteropanax	13.9	12.5
LS2	Litsea variabilis var. oblonga	Lauraceae	Litsea	4	7.3
LS2	Streblus tonkinensis	Moraceae	Streblus	3.3	2.5
LS2	Orophea polycarpa	Annonaceae	Orophea	2	2.2
LS2	Ardisia quinquegona	Primulaceae	Ardisia	1.3	2
LS2	Ardisia quinquegona	Primulaceae	Ardisia	4.4	5
LS2	Cychidendron guangxiensis	Fabaceae	Cylindrokelupha	7.5	6.6
LS2	Ardisia quinquegona	Primulaceae	Ardisia	2.2	2.5
LS2	Sterculia lanceolata	Malvaceae	Sterculia	2.6	3.2
LS2	Ficus oligodon	Moraceae	Ficus	6.3	7.5
LS2	Miliusa balansae	Annonaceae	Miliusa	4	7
LS2	Sterculia monosperma	Malvaceae	Sterculia	1.8	4
LS2	Ardisia thyrsiflora	Primulaceae	Ardisia	2.9	2.3
LS2	Sterculia monosperma	Malvaceae	Sterculia	4.1	4
LS2	Sterculia monosperma	Malvaceae	Sterculia	2.3	2.2
LS2	Orophea polycarpa	Annonaceae	Orophea	5.4	5
LS2	Ardisia quinquegona	Primulaceae	Ardisia	3.6	7.5
LS2	Sterculia monosperma	Malvaceae	Sterculia	5.7	6.5
LS2	Ficus oligodon	Moraceae	Ficus	20.8	11
LS2	Streblus tonkinensis	Moraceae	Streblus	15.3	9
LS2	Streblus tonkinensis	Moraceae	Streblus	9.4	6.5
LS2	Orophea polycarpa	Annonaceae	Orophea	1.7	4.8
LS2	Orophea polycarpa	Annonaceae	Orophea	2.8	4.5
LS2	Orophea polycarpa	Annonaceae	Orophea	2.5	4.3
LS2	Orophea polycarpa	Annonaceae	Orophea	2.6	4.5
LS2	Streblus tonkinensis	Moraceae	Streblus	17.8	8.8
LS2	Hydnocarpus hainanensis	Achariaceae	Hydnocarpus	2.1	4.2
[truncated: 4,344 more rows]

## Sheet: Environmental data
Plot no.	Slope position	Slope degree (°)	Rock outcrop rate (%)	Slope aspect	Soil pH	Soil organic matter (g·kg-1)	Soil total nitrogen (g·kg-1)	Soil total phosphorus (g·kg-1)	Soil total potassium(g·kg-1)	Soil exchangeable calcium (cmol·kg-1)	Soil water content (%)
DE1	1	6	0.3	0.265264	7.1	129.029	5.74759	1.84628	6.18707	31.545	24.5222
DE2	1	11	0.3	0.75	7.22	133.249	7.27177	2.06946	7.7778	38.8194	24.1917
DE3	1	3	0.35	0.000685233	7.44	53.5066	3.58386	1.25209	5.64141	14.3691	25.8833
DE4	1	0	0.05	0.0244717	7.2	120.854	4.41643	1.25818	5.65991	21.6374	19.7417
DE5	1	0	0.05	0.998097	6.69	88.1767	4.81295	1.16919	6.09458	20.8985	14.1417
DE6	1	11	0.4	0.909576	7.26	110.293	6.19806	1.97993	4.44836	68.4559	12.2
DE7	1	7	0.1	0.909576	6.75	72.8004	4.19574	1.11147	4.63333	16.6523	16.85
DE8	1	13	0.8	0.413176	7.05	123.177	8.88117	3.21788	7.09341	45.7316	17.8083
DE9	1	3	0.05	0.982963	7.62	86.0496	4.35941	1.85149	4.44836	43.9032	22.9417
DE10	1	8	0.1	0.996273	7.28	51.6608	4.72098	0.893508	4.2079	34.4272	20.3583
LS1	2	30	0.55	0	7.29	145.678	7.54163	1.71027	6.60324	56.9983	11.35
LS2	2	20	0.55	0.909576	7.02	82.7522	3.16997	0.884776	6.42752	24.4289	13.225
LS3	2	17	0.5	0.0714163	6.88	90.3164	5.53018	1.11783	4.99402	32.0962	21.2
LS4	2	35	0.45	0.23504	6.83	86.9118	5.46806	1.24555	4.66107	38.5836	19.8333
LS5	2	25	0.8	0.000685233	7.27	132.071	8.63571	2.74306	7.05642	58.9579	14.1417
LS6	2	40	0.65	0.257595	7.46	72.2235	5.47155	0.952279	6.63561	37.5043	16.575
LS7	2	35	0.55	0.953154	7.48	159.743	7.4992	1.43303	5.23448	48.7005	12.2667
LS8	2	25	0.8	0.945503	7.61	161.092	8.15107	1.93268	4.88304	67.8457	13
LS9	2	20	0.5	0.997261	7.41	110.058	5.88364	1.09116	13.2621	40.6178	23.1833
LS10	2	27	0.75	0.569587	7.47	161.797	5.92596	1.80459	5.94661	65.5921	19.875
MS1	3	27	0.45	0.793893	7.3	72.2212	6.74835	1.18048	4.86454	38.2122	16.475
MS2	3	30	0.6	0.909576	6.92	91.1736	5.41749	0.87739	5.82638	33.3714	17.2583
MS3	3	40	0.6	0.93731	7.5	100.867	7.22	1.02691	2.21949	50.6393	8.87778
MS4	3	35	0.65	0.00486597	7.67	122.599	6.54559	0.825744	2.64954	56.4936	14
MS5	3	40	0.55	0	7.89	55.481	4.17477	0.930705	2.79289	34.7905	15.775
MS6	3	30	0.65	0.000685233	7.52	89.4784	6.47948	1.11337	4.21715	61.9738	13.7833
MS7	3	25	0.65	0.995134	7.59	247.686	7.03575	1.44882	3.3293	40.4666	16.35
MS8	3	30	0.65	0.586824	6.91	125.021	6.80185	0.747479	3.64375	39.8122	9.85
MS9	3	30	0.7	0.62941	7.49	113.228	6.51192	1.08802	4.98477	42.6386	14.6083
MS10	3	40	0.65	0.0397476	7.36	141.908	6.48058	0.600543	0.970952	38.8242	12.1
US1	4	32	0.7	0.999315	7.5	150.204	7.73843	1.18832	2.80214	70.1488	7.64167
US2	4	37	0.68	0.586824	7.73	167.604	9.38923	1.0596	1.05419	76.26	6.95
US3	4	30	0.65	0.924024	7.53	83.909	5.20941	0.881195	5.72464	35.1524	17.4583
US4	4	33	0.55	0.662784	7.49	87.5648	5.31738	0.901732	3.08884	50.3065	20.0417
US5	4	24	0.45	0.62941	7.54	174.898	7.6684	0.51896	2.00678	73.8877	15.4167
US6	4	29	0.48	0.543578	7.5	155.327	5.80726	0.369373	0.684251	57.9642	14.5667
US7	4	40	0.9	0.447736	7.26	172.307	7.01806	0.367399	0.767487	69.0704	11.3517
US8	4	35	0.45	0.999315	7.13	132.159	4.82455	0.362349	0.494658	38.7643	11.4917
US9	4	33	0.7	0.980631	7.08	164.801	6.83135	0.355265	0.795232	52.1528	8.61111
US10	4	40	0.65	0.93731	7.56	148.676	3.87102	0.54685	0.767487	48.7935	12.8333
